# 1 **Peatland *Acidobacteria*** 2 **with a dissimilatory sulfur metabolism**

3 Bela Hausmann<sup>1,2</sup>, Claus Pelikan<sup>1</sup>, Craig W. Herbold<sup>1</sup>, Stephan Köstlbacher<sup>1</sup>, Mads Albertsen<sup>3</sup>,  
4 Stephanie A. Eichorst<sup>1</sup>, Tijana Glavina del Rio<sup>4</sup>, Martin Huemer<sup>1</sup>, Per H. Nielsen<sup>3</sup>, Thomas  
5 Rattei<sup>5</sup>, Ulrich Stingl<sup>6</sup>, Susannah G. Tringe<sup>4</sup>, Daniela Trojan<sup>1</sup>, Cecilia Wentrup<sup>1</sup>, Dagmar  
6 Woebken<sup>1</sup>, Michael Pester<sup>2,7</sup>, and Alexander Loy<sup>1</sup>

7 <sup>1</sup> University of Vienna, Research Network Chemistry meets Microbiology, Department of  
8 Microbiology and Ecosystem Science, Division of Microbial Ecology, Vienna, Austria

9 <sup>2</sup> University of Konstanz, Department of Biology, Konstanz, Germany

10 <sup>3</sup> Aalborg University, Department of Chemistry and Bioscience, Center for Microbial  
11 Communities, Aalborg, Denmark

12 <sup>4</sup> US Department of Energy Joint Genome Institute, Walnut Creek, CA, USA

13 <sup>5</sup> University of Vienna, Research Network Chemistry meets Microbiology, Department of  
14 Microbiology and Ecosystem Science, Division of Computational Systems Biology, Vienna,  
15 Austria

16 <sup>6</sup> University of Florida, Fort Lauderdale Research and Education Center, UF/IFAS, Department for  
17 Microbiology and Cell Science, Davie, FL, USA

18 <sup>7</sup> Leibniz Institute DSMZ, Braunschweig, Germany

19 Correspondence: Michael Pester, Leibniz Institute DSMZ, Inhoffenstraße 7B, 38124  
20 Braunschweig, Germany. Phone: +49 531 2616 237. Fax: +49 531 2616 418. E-mail:  
21 [michael.pesther@dsmz.de](mailto:michael.pesther@dsmz.de)

## 22 **Abstract**

23 Sulfur-cycling microorganisms impact organic matter decomposition in wetlands and  
24 consequently greenhouse gas emissions from these globally relevant environments. However,  
25 their identities and physiological properties are largely unknown. By applying a functional  
26 metagenomics approach to an acidic peatland, we recovered draft genomes of seven novel  
27 *Acidobacteria* species with the potential for dissimilatory sulfite (*dsrAB*, *dsrC*, *dsrD*, *dsrN*, *dsrT*,  
28 *dsrMKJOP*) or sulfate respiration (*sat*, *aprBA*, *qmoABC* plus *dsr* genes). Surprisingly, the genomes  
29 also encoded *dsrL*, a unique gene of the sulfur oxidation pathway. Metatranscriptome analysis  
30 demonstrated expression of acidobacterial sulfur-metabolism genes in native peat soil and their  
31 upregulation in diverse anoxic microcosms. This indicated an active sulfate respiration pathway,  
32 which, however, could also operate in reverse for sulfur oxidation as recently shown for other  
33 microorganisms. *Acidobacteria* that only harbored genes for sulfite reduction additionally  
34 encoded enzymes that liberate sulfite from organosulfonates, which suggested organic sulfur  
35 compounds as complementary energy sources. Further metabolic potentials included  
36 polysaccharide hydrolysis and sugar utilization, aerobic respiration, several fermentative  
37 capabilities, and hydrogen oxidation. Our findings extend both, the known physiological and  
38 genetic properties of *Acidobacteria* and the known taxonomic diversity of microorganisms with a  
39 DsrAB-based sulfur metabolism, and highlight new fundamental niches for facultative anaerobic  
40 *Acidobacteria* in wetlands based on exploitation of inorganic and organic sulfur molecules for  
41 energy conservation.

## 42 **Introduction**

43 Specialized microorganisms oxidize, reduce, or disproportionate sulfur compounds of various  
44 oxidation states (-II to +VI) to generate energy for cellular activity and growth and thereby drive  
45 the global sulfur cycle. The capability for characteristic sulfur redox reactions such as  
46 dissimilatory sulfate reduction or sulfide oxidation is not confined to single taxa but distributed  
47 across different, often unrelated taxa. The true extent of the taxon-diversity within the different  
48 guilds of sulfur microorganisms is unknown (Wasmund *et al.*, 2017). However, ecological studies  
49 employing specific sulfur metabolism genes (e.g., dissimilatory adenylyl-sulfate reductase-  
50 encoding *aprBA*, dissimilatory sulfite reductase-encoding *dsrAB*, or *soxB* that codes for a part of  
51 the thiosulfate-oxidizing Sox enzyme machinery) as phylogenetic and functional markers have  
52 repeatedly demonstrated that only a minor fraction of the sulfur metabolism gene diversity in  
53 many environments can be linked to recognized taxa (Meyer *et al.*, 2007; Müller *et al.*, 2015;  
54 Watanabe *et al.*, 2016). A systematic review of *dsrAB* diversity has revealed that the reductive  
55 bacterial-type enzyme branch of the DsrAB tree contains at least thirteen family-level lineages  
56 without any cultivated representatives. This indicates that major taxa of sulfate-/sulfite-reducing  
57 microorganisms have not yet been identified (Müller *et al.*, 2015).

58 Wetlands are among those ecosystems that harbor a diverse community of microorganisms with  
59 reductive-type DsrAB, most of which cannot be identified because they are distant from  
60 recognized taxa (Pester *et al.*, 2012). Sulfur-cycling microorganisms provide significant  
61 ecosystem services in natural and anthropogenic wetlands, which are major sources of the  
62 climate-warming greenhouse gas methane (Kirschke *et al.*, 2013; Saunio *et al.*, 2016). While  
63 inorganic sulfur compounds are often detected only at low concentration (lower  $\mu\text{M}$  range), fast  
64 sulfur cycling nevertheless ensures that oxidized sulfur compounds such as sulfate are rapidly  
65 replenished for anaerobic respiration. The activity of sulfate-reducing microorganisms (SRM)  
66 fluctuates with time and space, but at peak times can account for up to 50% of anaerobic  
67 mineralization of organic carbon in wetlands (Pester *et al.*, 2012). Simultaneously, SRM prevent  
68 methane production by rerouting carbon flow away from methanogenic archaea. Autochthonous  
69 peat microorganisms that are affiliated to known SRM taxa, such as *Desulfosporosinus*,  
70 *Desulfomonile*, and *Syntrophobacter*, are typically low abundant (Loy *et al.*, 2004; Costello and  
71 Schmidt, 2006; Dedysh *et al.*, 2006; Kraigher *et al.*, 2006; Pester *et al.*, 2010; Steger *et al.*,  
72 2011; Tveit *et al.*, 2013; Hausmann *et al.*, 2016). In contrast, some microorganisms that belong  
73 to novel, environmental *dsrAB* lineages can be considerably more abundant in wetlands than  
74 species-level *dsrAB* operational taxonomic units of known taxa (Steger *et al.*, 2011). However,  
75 the taxonomic identity of these novel *dsrAB*-containing microorganisms and their role in sulfur  
76 and carbon cycling has yet to be revealed.

77 Here, we recovered thirteen metagenome-assembled genomes (MAGs) encoding DsrAB of  
78 uncultured species from a peat soil by using a targeted, functional metagenomics approach. We  
79 analyzed expression of predicted physiological capabilities of the MAGs by metatranscriptome  
80 analyses of anoxic peat soil microcosms that were periodically stimulated by small additions of  
81 individual fermentation products with or without supplemented sulfate (Hausmann *et al.*, 2016).  
82 Our results suggest that some facultatively anaerobic members of the diverse *Acidobacteria*  
83 community in wetlands employ a dissimilatory sulfur metabolism.

## 84 **Materials and methods**

### 85 **Anoxic microcosm experiments, stable isotope probing, and nucleic acids isolation**

86 DNA and RNA samples were retrieved from a previous peat soil microcosm experiment  
87 (Hausmann *et al.*, 2016). Briefly, soil from 10–20 cm depth was sampled from an acidic peatland  
88 (Schlöppnerbrunnen II, Germany) in September 2010, and stored at 4 °C for one week prior to  
89 nucleic acids extractions and set-up of soil slurry incubations. Individual soil slurry microcosms  
90 were incubated anoxically (100% N<sub>2</sub> atmosphere) in the dark at 14 °C, and regularly amended  
91 with low amounts (<200 μM) of either formate, acetate, propionate, lactate, butyrate, or without  
92 any additional carbon sources (six replicates each). In addition, half of the microcosms for each  
93 substrate were periodically supplemented with low amounts of sulfate (initial amendment of  
94 190–387 μM with periodic additions of 79–161 μM final concentrations). DNA and RNA were  
95 extracted from the native soil and RNA was additionally extracted from the soil slurries after 8  
96 and 36 days of incubation.

97 Furthermore, DNA was obtained from the heavy, <sup>13</sup>C-enriched DNA fractions of a previous DNA-  
98 stable isotope probing (DNA-SIP) experiment with soil from the same site (Pester *et al.*, 2010).  
99 Analogous to the single-substrate incubations, anoxic soil slurries were incubated for two  
100 months with low-amounts of sulfate and a <sup>13</sup>C-labelled mixture of formate, acetate, propionate,  
101 and lactate. DNA was extracted, separated on eight replicated density gradients, and DNA from  
102 a total of 16 heavy fractions (density 1.715–1.726 g mL<sup>-1</sup>) was pooled for sequencing.

103 Additional DNA was obtained from soils that were sampled from different depths in the years  
104 2004 and 2007 (Steger *et al.*, 2011).

### 105 **Quantitative PCR and metagenome/-transcriptome sequencing**

106 Abundances of *Acidobacteria* subdivision 1, 2, and 3 in soil samples from different years and  
107 depths were determined by newly-developed 16S rRNA gene-targeted real-time quantitative  
108 PCR (qPCR) assays (Supplementary Methods). Native soil DNA (two libraries), heavy <sup>13</sup>C-  
109 enriched DNA (three libraries), and native soil RNA, and RNA samples from the microcosms were  
110 sequenced on an Illumina HiSeq2000 system (Supplementary Methods).

## 111 **Binning, phylogeny, and annotation of DsrAB-encoding genomes**

112 The differential coverage binning approach by Albertsen *et al.* (2013) was applied to extract  
113 MAGs of interest. The raw FASTQ paired-end reads were imported into the CLC Genomics  
114 Workbench 5.5.1 (CLC Bio) and trimmed using a minimum Phred quality score of 20 with no  
115 ambiguous nucleotides allowed. TruSeq adapters were removed and a minimum length filter of  
116 50 nt was applied. This resulted in 214, 171, 233, 49, and 294 million reads after quality filtering  
117 and trimming for the two native soil and three SIP metagenomes, respectively (84–95% of the  
118 raw reads). All reads were co-assembled using CLCs *de novo* assembly algorithm (kmer size 63,  
119 bubble size 50, minimum scaffold size 1000 nt). The reads from all five metagenomes were  
120 independently mapped to the assembled scaffolds using CLCs map to reference function  
121 (minimum length 0.7, minimum similarity 0.95) to obtain the scaffold coverage. The SIP  
122 metagenomes were merged into one mapping. 137, 112, and 376 million reads could be  
123 mapped to the two native soil metagenomes and the SIP metagenome, respectively (64–66% of  
124 quality filtered reads). Gene prediction of the complete assembly was performed using prodigal  
125 (Hyatt *et al.*, 2010). In addition to the detection and taxonomic classification of 105 essential  
126 marker genes (Albertsen *et al.*, 2013), *dsrA* and *dsrB* homologs were identified using TIGRFAM's  
127 hidden Markov model (HMM) profiles TIGR02064 and TIGR02066, respectively, with HMMER 3.1  
128 (Eddy, 2011) and the provided trusted cut-offs. Additional *dsrAB*-containing scaffolds were  
129 identified by using tblastn with the published DsrAB database as a query against the assembly  
130 (Müller *et al.*, 2015). DsrAB sequences were classified by phylogenetic analysis (Supplementary  
131 Methods; Müller *et al.*, 2015). Binning and decontamination was finalized utilizing the G+C  
132 content and tetramer frequencies of the scaffolds, as well as paired-end information, as  
133 described and recommended in Albertsen *et al.* (2013). Completeness, contamination, and  
134 strain heterogeneity was estimated using CheckM 1.0.6 (Parks *et al.*, 2015) with lineage-specific  
135 marker sets selected at phylum rank (or class rank for *Proteobacteria*). MAGs were  
136 taxonomically classified by phylogenomic analysis of concatenated marker sequences and  
137 calculation of average nucleic and amino acid identities (ANI, AAI, Supplementary Methods).  
138 MAGs were annotated using MaGe (Vallenet *et al.*, 2017) and eggNOG (Huerta-Cepas *et al.*,  
139 2016). Genes of interest (Supplementary Table S2) were manually curated using the full range  
140 of tools integrated in MaGe (Supplementary Methods).

## 141 **Genome-centric activity analysis: iRep and metatranscriptomics**

142 The index of replication (iRep) was calculated for each MAG with the combined native soil  
143 metagenomes. Settings and thresholds were applied as recommended (Brown *et al.*, 2016)  
144 using bowtie2 (Langmead and Salzberg, 2012) and the iRep script with default settings. Quality-  
145 filtered metatranscriptome reads were mapped to all genomes using bowtie2 and counted with  
146 featureCounts (Liao *et al.*, 2014). To determine gene expression changes, we applied the  
147 DESeq2 pipeline with recommended settings (Love *et al.*, 2014) (Supplementary Methods).

## 148 **Data availability**

149 Metagenomic and -transcriptomic data were deposited under the BioProject accession numbers  
150 PRJNA412436 and PRJNA412438, respectively, and can also be obtained via the JGI's genome  
151 portal (JGI Proposal ID 605). MAGs were deposited under the BioProject accession number  
152 PRJNA412580.

## 153 **Results**

### 154 **Functional metagenomics: Recovery of *dsrAB*-containing acidobacterial genomes** 155 **from native soil and <sup>13</sup>C-DNA fraction metagenomes**

156 This study was conducted with soil samples from the Schlöppnerbrunnen II peatland in  
157 Germany, which is a long-term study site with active sulfur cycling and harbors a large diversity  
158 of unknown microorganisms with divergent *dsrAB* genes (Steger *et al.*, 2011; Pester *et al.*,  
159 2012). We initially generated co-assembled metagenomes from native peat soil DNA (53 Gb)  
160 and a pool of DNA extracts from the heavy fractions of a previous DNA-stable isotope probing  
161 (DNA-SIP) experiment with soil from the same peat (101 Gb). The heavy fractions, which were  
162 obtained from anoxic peat incubations with periodically supplemented sulfate and a mixture of  
163 <sup>13</sup>C-labelled formate, acetate, propionate, and lactate at low concentrations, were enriched in  
164 DNA from *Desulfosporosinus* and also harbored DNA from yet unidentified *dsrAB*-containing  
165 microorganisms (Pester *et al.*, 2010). Based on the metagenome data, the native peat was  
166 dominated by *Acidobacteria* (61%), but also had *Actinobacteria*, *Alphaproteobacteria*, and  
167 *Deltaproteobacteria* as abundant (>5%) phyla/classes (Figure 1). Dominance of *Acidobacteria*,  
168 *Alpha*- and *Deltaproteobacteria* is typical for peatlands (Dedysh, 2011). Quantitative PCR  
169 confirmed that *Acidobacteria* subdivisions 1, 2, and 3 persistently dominated the  
170 Schlöppnerbrunnen II peat microbiota in oxic and anoxic soil layers (Supplementary Methods,  
171 Figure 1), as observed in other peatlands (Serkebaeva *et al.*, 2013; Urbanová and Bárta, 2014;  
172 Ivanova *et al.*, 2016).

173 We identified 36 complete or partial *dsrAB* genes on scaffolds of the composite metagenome  
174 and subsequently recovered thirteen MAGs of DsrAB-encoding bacteria by differential coverage  
175 binning (Supplementary Table S1, Albertsen *et al.*, 2013). Twenty-eight *dsrAB* sequences were  
176 part of the reductive bacterial-type DsrAB family branch and were closely related to previously  
177 recovered sequences from this and other wetlands (Supplementary Figure S1). These *dsrAB*  
178 sequences were affiliated to the known SRM genera *Desulfosporosinus* (*Firmicutes*, n=1, one  
179 MAG) and *Syntrophobacter* (*Deltaproteobacteria*, n=3, two MAGs), the *Desulfobacca*  
180 *acetoxidans* lineage (n=1), and the uncultured DsrAB family-level lineages 8 (n=19, seven  
181 MAGs) and 10 (n=4). Six sequences grouped with the oxidative bacterial-type DsrAB family and  
182 were distantly affiliated with *Sideroxydans lithotrophicus* (*Betaproteobacteria*, n=5, two MAGs)  
183 or *Rhodomicrobium vannielii* (*Alphaproteobacteria*, n=1) (Supplementary Figure S2).

184 Interestingly, two of our sequences (n=2, one MAG) and a DsrAB sequence from the candidate  
185 phylum *Rokubacteria* (Hug *et al.*, 2016) formed a completely novel basal lineage outside the  
186 four previously recognized DsrAB enzyme families (Supplementary Figure S2) (Müller *et al.*,  
187 2015). The thirteen partial to near complete *dsrAB*-containing MAGs had moderate to no  
188 detectable contamination as assessed by CheckM (Supplementary Table S1) (Parks *et al.*, 2015)  
189 and derived from *Acidobacteria* subdivisions 1 and 3 (SbA1-7), *Desulfosporosinus* (SbF1),  
190 *Syntrophobacter* (SbD1, SbD2), *Betaproteobacteria* (SbB1, SbB2), and *Verrucomicrobia* (SbV1),  
191 as inferred by phylogenetic analysis of DsrAB sequences (Supplementary Figures S1 and S2)  
192 and concatenated sequences of single-copy, phylogenetic marker genes (Supplementary Figure  
193 S3). Only the *Desulfosporosinus* and *Syntrophobacter* MAGs contained rRNA gene sequences.

194 Phylogenomic analysis showed that *Acidobacteria* MAGs SbA1, SbA5, and SbA7 are affiliated  
195 with subdivision 1, while SbA3, SbA4, and SbA6 are affiliated with subdivision 3 (Supplementary  
196 Figure S3). The partial MAG SbA2 lacked the marker genes used for phylogenomic treeing, but  
197 was unambiguously assigned to *Acidobacteria* using an extended marker gene set (Albertsen *et al.*,  
198 2013) and DsrAB phylogeny. The two near complete (96%) MAGs SbA1 and SbA5 have a size  
199 of 5.4 and 5.3 Mb, respectively. The G+C content of all MAGs ranges from 58% to 63%  
200 (Supplementary Table S1). This in accordance with genome characteristics of acidobacterial  
201 isolates, which have genome sizes of 4.1-10.0 Mb and G+C contents of 57-62% (Ward *et al.*,  
202 2009; Rawat *et al.*, 2012.). SbA1 and SbA7 form a monophyletic clade in the *Acidobacteria*  
203 subdivision 1 with an AAI (Rodriguez-R and Konstantinidis, 2014) of 63% (Supplementary Figure  
204 S3) and DsrAB identity of 80%. They have 56% AAI to their closest relative, *Ca. Koribacter*  
205 *versatilis*, which is lower than AAIs among members of known acidobacterial genera (60-71%).  
206 The third MAG from subdivision 1, SbA5, is affiliated with *Terracidiphilus gabretensis* with an AAI  
207 of 61%. DsrAB identity of SbA5 to SbA1 and SbA7 is 79%. The three subdivision 3 MAGs form a  
208 monophyletic clade with *Ca. Solibacter usitatus* (Supplementary Figure S3). SbA3, SbA4, and  
209 SbA6 have AAIs of 59-73% amongst them and 61-62% to *Ca. S. usitatus*. DsrAB identity  
210 amongst the three MAGs is 80-94% and 74-79% to the subdivisions 1 MAGs.

211 The DsrAB sequences encoded on all seven MAGs are affiliated with the uncultured DsrAB  
212 family-level lineage 8 (Supplementary Figure S1), which so far only consisted of environmental  
213 *dsrAB* sequences of unknown taxonomic identity (Müller *et al.*, 2015). Based on these MAGs and  
214 metatranscriptome analyses of anoxic peat soil microcosms, we here describe the putative  
215 metabolic capabilities of these novel DsrAB-encoding *Acidobacteria*. Details on the other MAGs  
216 will be described elsewhere (Hausmann *et al.*, unpublished; Anantharaman *et al.*, unpublished).  
217 Functional interpretations of the recovered MAGs are made under the premise that the genomes  
218 are not closed, and thus it is unknown if genes are absent in these organisms or are missing due  
219 to incomplete sequencing, assembly, or binning.

## 220 **Dissimilatory sulfur metabolism**

221 Although *Acidobacteria* are abundant in diverse environments with active sulfur cycling  
222 (Serkebaeva *et al.*, 2013; Urbanová and Bárta, 2014; Sánchez-Andrea *et al.*, 2011; Wang *et al.*,  
223 2012), this is the first discovery of members of this phylum with a putative dissimilatory sulfur  
224 metabolism. SbA2, SbA3, and SbA7 encode the complete canonical pathway for dissimilatory  
225 sulfate reduction, including homologs for sulfate transport (*sulP* and/or *dass*, not in SbA7) and  
226 activation (*sat*, *ppa*, *hppA*), adenosine 5'-phosphosulfate (APS) reduction (*aprBA*, *qmoABC*), and  
227 sulfite reduction (*dsrAB*, *dsrC*, *dsrMKJOP*) (Figure 2, Supplementary Table S2a) (Santos *et al.*,  
228 2015). SbA1, SbA4, SbA5, and SBA6 have an incomplete sulfate reduction gene set but contain  
229 all *dsr* genes for sulfite reduction. Several other *dsr* genes were present on some of the MAGs.  
230 The *dsrD* and *dsrN* genes occurred in pairs. The role of the small DsrD protein is unresolved, but  
231 its ubiquity among SRM suggests an essential function in sulfate reduction (Hittel and  
232 Voordouw, 2000). DsrN is a homolog of cobyrinate a,c-diamide synthase in cobalamin  
233 biosynthesis and may be involved in amidation of the siroheme prosthetic group of DsrAB  
234 (Lübbe *et al.*, 2006). DsrV, a homolog of precorrin-2 dehydrogenase, and DsrWa, a homolog of  
235 uroporphyrin-III C-methyltransferase, may also be involved in siroheme biosynthesis  
236 (Holkenbrink *et al.*, 2011). DsrT is required for sulfide oxidation in *Chlorobaculum tepidum*, but  
237 also found in SRM (Holkenbrink *et al.*, 2011). The presence of *dsrMK*-paralogs (*dsrM2*, *dsrK2*)  
238 upstream of *dsrAB* is not uncommon in SRM (Pereira *et al.*, 2011). DsrMK are present in all  
239 *dsrAB*-containing microorganisms and are a transmembrane module involved in reduction of  
240 cytoplasmic DsrC-trisulfide in SRM, the final step in sulfate reduction (Santos *et al.*, 2015). DsrC  
241 encoded on the MAGs have the two essential cysteine residues at the C-terminal end for full  
242 functionality (Venceslau *et al.*, 2014). Interestingly, *dsrC* forms a gene duo with *dsrL*  
243 downstream of *dsrAB* in all seven MAGs. This is surprising, because *dsrL* is not found in SRM but  
244 in sulfur oxidizers. DsrL is highly expressed and essential for sulfur oxidation by the purple sulfur  
245 bacterium *Allochromatium vinosum* (Lübbe *et al.*, 2006; Weissgerber *et al.*, 2014). DsrL is a  
246 cytoplasmic iron-sulfur flavoprotein with proposed NAD(P)H:acceptor oxidoreductase activity  
247 and was copurified with DsrAB from the soluble fraction of *A. vinosum* (Dahl *et al.*, 2005). Given  
248 the possible role of DsrL in sulfur oxidation, we sought to detect additional genes indicative of  
249 oxidative sulfur metabolism in the acidobacterial MAGs. However, genes for sulfide:quinone  
250 reductase (*sqr*), adenylyl-sulfate reductase membrane anchor subunit (*aprM*), flavocytochrome  
251 c sulfide dehydrogenase (*fccAB*), sulfur reductase (*sreABC*), thiosulfate reductase (*phsABC*),  
252 polysulfide reductase (*psrABC*), membrane-bound sulfite oxidizing enzyme (*soeABC*),  
253 cytoplasmic sulfur trafficking enzymes (*tusA*, *dsrE2*, *dsrEFH*), or DsrQ/DsrU (unknown functions)  
254 were absent (Laska *et al.*, 2003; Holkenbrink *et al.*, 2011; Lenk *et al.*, 2012; Wasmund *et al.*,  
255 2017). SbA1, SbA3, SbA4, and SbA6 contain genes that have only low homology to  
256 *soxCD/sorAB*, periplasmic sulfite-oxidizing enzymes (Supplementary Results) and, thus, might  
257 have another function (Ghosh and Dam, 2009).



258 Despite ongoing sulfur cycling, concentrations of inorganic sulfur compounds such as sulfate are  
259 low (lower  $\mu\text{M}$  range) in the Schlöppnerbrunnen II peatland (Schmalenberger *et al.*, 2007; Küsel  
260 *et al.*, 2008; Knorr and Blodau, 2009). Enzymatic release of inorganic sulfur compounds from  
261 organic matter might thus represent a significant resource for sulfur-dissimilating  
262 microorganisms. We thus specifically searched for genes coding for known organosulfur  
263 reactions that yield sulfite (Wasmund *et al.*, 2017). Genes for cysteate sulfo-lyase (*cuyA*),  
264 methanesulfonate monooxygenase (*msmABCD*), sulfoacetaldehyde acetyltransferase (*xsc*), and  
265 taurine dioxygenase (*tauD*) were absent. However, *suyAB*, coding for the (*R*)-sulfolactate sulfo-  
266 lyase complex that cleaves (*R*)-sulfolactate into pyruvate and sulfite (Denger and Cook, 2010),  
267 were present in SbA4 and SbA5 (Supplementary Table S2a). Intriguingly, SbA4 and SbA5 only  
268 have capability for sulfite reduction. SbA5 also encodes the racemase machinery for (*S*)-  
269 sulfolactate to (*R*)-sulfolactate, (*S*)-sulfolactate dehydrogenase (*slcC*) and (*R*)-sulfolactate  
270 dehydrogenase (*comC*); the regulator gene *suyR* or the putative importer SlcHFG were absent  
271 (Denger and Cook, 2010). Pyruvate may be used as an energy and carbon source, while sulfite  
272 could be used as an electron acceptor for anaerobic respiration (Simon and Kroneck, 2013).

## 273 **Respiration**

274 Cultivated *Acidobacteria* of subdivisions 1 and 3 are strict aerobes or facultative anaerobes  
275 (e.g., Eichorst *et al.*, 2007; Kulichevskaya *et al.*, 2010, 2014; Pankratov and Dedysh, 2010;  
276 Dedysh *et al.*, 2012; Pankratov *et al.*, 2012). Accordingly, we found respiratory chains encoded  
277 in all acidobacterial MAGs (Figure 3, Supplementary Results), with (near) complete operons for  
278 NADH dehydrogenase 1, succinate dehydrogenase (lacking in SbA2), one or both types of quinol  
279 —cytochrome-c reductase, low-affinity terminal oxidases, and ATP synthase (lacking in SbA2)  
280 (Supplementary Tables S2b–h). High-affinity terminal oxidases, putatively involved in  
281 detoxification of oxygen (Ramel *et al.*, 2013; Giuffrè *et al.*, 2014), are limited to four MAGs  
282 (Supplementary Table S2g). Genes for dissimilatory nitrogen or iron metabolisms are absent,  
283 with the exception of a putative metal reductase in SbA2 of unclear physiological role  
284 (Supplementary Results).

## 285 **Hydrogen utilization and production**

286 We identified [NiFe] hydrogenases of groups 1, 3, and 4 (Greening *et al.*, 2016) in SbA1–7  
287 (Supplementary Table S2j). Membrane-bound group 1 hydrogenases (SbA1, SbA3, SbA5)  
288 consume hydrogen from the periplasm as an electron donor to generate energy, possibly  
289 coupled to sulfate/sulfite reduction. In contrast to other *Acidobacteria*, no group 1h/5  
290 hydrogenases, which are coupled to oxygen respiration, were identified (Greening *et al.*, 2015).  
291 Cytoplasmic group 3 hydrogenases (all MAGs) are bidirectional and proposed to be involved in  
292 energy-generating hydrogen oxidation and/or fermentative hydrogen production. Membrane-  
293 bound group 4 hydrogenases (SbA1, SbA5, SbA4, SbA6) produce  $\text{H}_2$  and are postulated to

294 conserve energy by proton translocation by oxidizing substrates like formate (group 4a) or  
295 carbon monoxide (via ferredoxin, group 4c) (Figure 3).

## 296 **A versatile heterotrophic physiology**

297 *Acidobacteria* are known for their capability to degrade simple and polymeric carbohydrates  
298 (e.g., Kulichevskaya *et al.*, 2010, 2014; Pankratov and Dedysh, 2010; Dedysh *et al.*, 2012;  
299 Eichorst *et al.*, 2011; Pankratov *et al.*, 2012; Rawat *et al.*, 2012; Huber *et al.*, 2016), supported  
300 by many diverse carbohydrate-active enzymes encoded in their genomes (Ward *et al.*, 2009;  
301 Rawat *et al.*, 2012). Accordingly, the MAGs recovered in our study also contain many genes  
302 encoding diverse carbohydrate-active enzymes (Supplementary Methods, Figure 4). These  
303 include glycoside hydrolases (GH, 1.0–4.0% of all genes), polysaccharide lyases (0.07–0.3%),  
304 and carbohydrate esterases (0.7–1.4%) that are generally involved in degradation of complex  
305 sugars, but also glycosyltransferases (0.9–1.4%) for biosynthesis of carbohydrates. Functional  
306 GH gene groups (assigned by EC number) involved in cellulose and hemicellulose degradation  
307 were most prevalent (Supplementary Table S4). Specifically, the most abundant EC numbers are  
308 involved in cellulose (EC 3.2.1.4, e.g., GH5, GH74), xyloglucan (EC 3.2.1.150, EC 3.2.1.151, e.g.,  
309 GH5, GH74), or xylan (EC 3.2.1.8, EC 3.2.1.37, e.g., GH5) degradation, similar to other members  
310 of *Acidobacteria* subdivision 1 and 3 (Ward *et al.*, 2009; Rawat *et al.*, 2012). Other abundant EC  
311 numbers were associated with oligosaccharide degradation (EC 3.2.1.21, e.g., GH2) or  $\alpha$ -*N*-  
312 acetylgalactosaminidase genes (EC 3.2.1.49, e.g., GH109). Degradation of cellulose and  
313 hemicellulose yields glucose and all MAGs encode glycolysis and pentose phosphate pathways  
314 (Figure 3, Supplementary Results).  $\alpha$ -*N*-acetylgalactosaminidase releases *N*-acetylgalactosamine  
315 residues from glycoproteins that are commonly found in microbial cell walls and extracellular  
316 polysaccharides (Bodé *et al.*, 2013). *N*-acetylgalactosamine can not be directly utilized via  
317 glycolysis, however the additionally required enzymes are present (Figure 3; Supplementary  
318 Results). Under oxic conditions, organic carbon could be completely oxidized to CO<sub>2</sub> via the citric  
319 acid cycle (Figure 3). Alternatively, we also identified fermentative pathways. SbA3 encodes the  
320 bifunctional aldehyde-alcohol dehydrogenase AdhE that yields ethanol (Figure 3). All MAGs  
321 encode additional aldehyde and alcohol dehydrogenases without clear substrate specificity that  
322 could also ferment acetyl-CoA to ethanol. SbA7 and SbA5 encode a L-lactate dehydrogenase  
323 (Ldh) yielding lactate from pyruvate, while six MAGs encode L-lactate dehydrogenases (LldD,  
324 GlcDEF, LutABC) that presumably perform the reverse reaction (Figure 3). Similarly, we  
325 identified pathways for acetate and/or propionate production or utilization in all MAGs (Figure 3;  
326 Supplementary Results). SbA1 and SbA3 potentially produce H<sub>2</sub> via formate C-acetyltransferase  
327 PflD, which cleaves pyruvate into acetyl-CoA and formate. SbA1 encodes for the membrane-  
328 bound formate hydrogenlyase complex (*fdhF*, *hyf* operon) that produces H<sub>2</sub> and might also  
329 translocate protons. SbA3 harbours an uncharacterized, cytoplasmic, monomeric FDH (*fdhA*) to  
330 transform formate to H<sub>2</sub>. SbA1, SbA3, SbA4, and SbA6 also encode membrane-bound,

331 periplasmic FDH (*fdo* operon) that transfers electrons into the membrane quinol pool, as a non-  
332 fermentative alternative of formate oxidation (Figure 3, Supplementary Table S2j).

### 333 **DsrAB-encoding *Acidobacteria* are metabolically active under anoxic conditions**

334 We calculated the index of replication (iRep) with the native soil metagenomes to assess if the  
335 DsrAB-encoding *Acidobacteria* were active *in situ* (Brown *et al.*, 2016). SbA1 and SbA5, which  
336 were sufficiently complete ( $\geq 75\%$ ) for accurate measurements, had iRep values of 1.21 and  
337 1.19, respectively. This shows that a fraction of each population was metabolically active, i.e.,  
338 on average 21% of SbA1 and 19% of SbA5 cells were actively replicating at the time of  
339 sampling. Concordantly, SbA1-7 were also transcriptionally active in the same native soil  
340 samples. 35-46% of the SbA1-7 genes were expressed in at least one replicate. SbA1 and SbA5  
341 contributed a considerable fraction (0.4% and 1.8%, respectively, Supplementary Table S1) of  
342 the total mRNA reads in the native soil metatranscriptome. These data likely underestimate the  
343 metabolic activity of SbA1-7 *in situ* because freshly sampled soil was stored at 4 °C for one  
344 week prior to nucleic acids extraction.

345 We further analyzed metatranscriptome data from a series of anoxic incubations of the peat soil  
346 with or without individual substrates (formate, acetate, propionate, lactate, or butyrate) and  
347 with or without supplemental sulfate (Hausmann *et al.*, 2016). While the incubations were not  
348 designed to specifically test for the MAG-inferred metabolic properties, they still allowed us to  
349 evaluate transcriptional response of the DsrAB-encoding *Acidobacteria* under various anoxic  
350 conditions (Supplementary Methods and Results). All treatments triggered shifts in genome-  
351 wide gene expression; more genes were significantly ( $p < 0.05$ ) upregulated (73-933) than  
352 downregulated (14-81) as compared to the native soil. Upregulated genes included sulfur  
353 metabolism, high-affinity terminal oxidases, group 1 and 3 hydrogenases, aldehyde-alcohol  
354 dehydrogenase AdhE, glycoside hydrolases, and other carbon metabolism genes  
355 (Supplementary Table S3). Significantly upregulated glycoside hydrolase genes were GH 2, 3, 5,  
356 9, 10, 18, 20, 23, 26, 28, 29, 30, 33, 35, 36, 38, 43, 44, 50, 51, 55, 74, 76, 78, 79, 88, 95, 97,  
357 105, 106, 109, and 129 genes in MAGs SbA1-6. None of the GH genes were significantly  
358 downregulated in the incubations. Noteworthy genes that were significantly downregulated  
359 were superoxide dismutases (*sodA*) in SbA2 and SbA4 (Supplementary Table S3a).

## 360 **Discussion**

361 Diverse members of the phylum *Acidobacteria* are abundant in various ecosystems, particularly  
362 in soils and sediments with relative abundances typically ranging from 20-40% (Janssen, 2006).  
363 *Acidobacteria* are currently classified in 26 subdivisions based on 16S rRNA phylogeny (Barns *et al.*,  
364 2007). Given their phylogenetic breadth, comparably few isolates and genomes are  
365 available to explore their metabolic capabilities. Yet strains in subdivisions 1, 3, 4, and 6 are

366 aerobic chemoorganotrophs that grow optimally at neutral or low pH (Dedysh, 2011; Eichorst et  
367 *al.*, 2011; Huber *et al.*, 2014, 2016). Furthermore, subdivision 4 contains an anoxygenic  
368 phototroph (Garcia Costas *et al.*, 2012; Tank and Bryant, 2015), subdivisions 8 and 23 contain  
369 anaerobes (Liesack *et al.*, 1994; Coates *et al.*, 1999; Losey *et al.*, 2013), subdivisions 1, 3, and  
370 23 fermentors (Pankratov *et al.*, 2012; Kulichevskaya *et al.*, 2014; Losey *et al.*, 2013; Myers and  
371 King, 2016) and subdivision 4, 8, 10 and 23 thermophiles (Izumi *et al.*, 2012; Losey *et al.*, 2013;  
372 Crowe *et al.*, 2014; Tank and Bryant, 2015).

373 *Acidobacteria* have previously been described as dominant inhabitants of wetlands worldwide,  
374 namely members of subdivision 1, 3, 4, and 8 (Dedysh, 2011). Strains in the genera *Granulicella*  
375 (Pankratov and Dedysh, 2010), *Telmatobacter* (Pankratov *et al.*, 2012), *Bryocella* (Dedysh *et al.*,  
376 2012) and *Bryobacter* (Kulichevskaya *et al.*, 2010) have been isolated from acidic wetlands and  
377 are presumably active in plant-derived polymer degradation (such as cellulose) (Dedysh, 2011;  
378 Pankratov *et al.*, 2011; Schmidt *et al.*, 2015; Jouttonen *et al.*, 2017), and in nitrogen and iron  
379 cycling (Küsel *et al.*, 2008; Kulichevskaya *et al.*, 2014).

380 Here, we provide metagenomic and metatranscriptomic evidence that select *Acidobacteria* have  
381 a dissimilatory sulfur metabolism. The seven acidobacterial MAGs from the Schlöppnerbrunnen  
382 II peatland encode a complete dissimilatory sulfite or sulfate reduction pathway and represent  
383 novel species of at least three novel genera in subdivision 1 or 3 (Supplementary Figure S3).  
384 The phylogenetic separation into the two subdivisions in the concatenated marker gene tree is  
385 also apparent in the DsrAB tree (Supplementary Figure S1). The acidobacterial DsrAB sequences  
386 are distributed on two monophyletic clades within the uncultured family-level lineage 8 of the  
387 reductive, bacterial-type DsrAB enzyme family branch (Müller *et al.*, 2015). Furthermore, the  
388 phylogenetic breadth of the acidobacterial DsrAB sequences is representative of the intra-  
389 lineage sequence divergence, which suggests that the entire DsrAB lineage 8 represents yet  
390 uncultivated bacteria of the phylum *Acidobacteria*. Members of this uncultured DsrAB lineage  
391 are widespread in freshwater wetlands (Supplementary Figure S1) (Pester *et al.*, 2012) and an  
392 abundant fraction of the *dsrAB* diversity and permanent autochthonous inhabitants of oxic and  
393 anoxic soil layers in the Schlöppnerbrunnen II peatland (Steger *et al.*, 2011; Pester *et al.*, 2010).

394 Presence of a complete gene set for canonical dissimilatory sulfate reduction suggests that the  
395 pathway is functional, as the genetic capability for sulfate reduction can be rapidly lost by  
396 adaptive evolution if unused (Hillesland *et al.*, 2014). Except for a truncated *aprB* on SbA6, we  
397 found no indications of pseudogenes, i.e., unexpected internal stop codons or reading frame  
398 shifts, for any of the sulfate/sulfite reduction genes on the acidobacterial MAGs (Müller *et al.*,  
399 2015). In addition, sulfur genes of each MAG were expressed in the native soil and the anoxic  
400 microcosms (Supplementary Table S3a). Many sulfur metabolism genes were also significantly  
401 upregulated in the microcosms, with *dsrC* and *aprBA* among the top 10 most expressed genes in  
402 SbA7 (Supplementary Table S3a). These findings further support full functionality of the  
403 acidobacterial dissimilatory sulfur pathways under anoxic condition.

404 Known SRM typically couple sulfate respiration to oxidation of fermentation products such as  
405 volatile fatty acids, alcohols, or hydrogen (Rabus *et al.*, 2013). While other microorganisms in  
406 the Schlöppnerbrunnen II soil, such as *Desulfosporosinus*, showed sulfate- and substrate-specific  
407 responses in our microcosms, hundreds of acidobacterial 16S rRNA phylotypes did not (with the  
408 exception of two) (Hausmann *et al.*, 2016). Gene expression patterns of DsrAB-encoding  
409 *Acidobacteria* in the individual anoxic microcosms as analyzed in the present study were  
410 ambiguous. Genes for putative oxidation of the supplemented substrates (formate, acetate,  
411 propionate, lactate, butyrate) were not specifically upregulated, neither with nor without  
412 supplemental sulfate. However, sulfur metabolism genes were upregulated in some incubations  
413 as compared to no-substrate-controls, suggesting indirect stimulation of sulfur dissimilation  
414 (Supplementary Results, Supplementary Table S3a). Indirect changes in microbial activity after  
415 the addition of fresh organic matter is often observed in soils (priming effects, Blagodatskaya  
416 and Kuzyakov, 2008). One priming effect explanation is the co-metabolism theory stating that  
417 easily available substrates provide the energy for microorganisms to produce extracellular  
418 enzymes to make immobile carbon accessible, which is then also available to other  
419 microorganisms. The DsrAB-encoding *Acidobacteria* have vast genetic capabilities for utilization  
420 of carbohydrates and complete sugar degradation pathways (Figure 3), in accordance with  
421 carbohydrate utilization potential previously described for subdivision 1 and 3 *Acidobacteria*  
422 (Ward *et al.*, 2009; Rawat *et al.*, 2012). Yet carbohydrate utilization coupled to sulfate reduction  
423 is a rare feature of known SRM [Cord-Ruwisch *et al.* (1986); Stetter (1988);]. While expression of  
424 many of their glycoside hydrolase genes was upregulated in our anoxic peat soil microcosms,  
425 further experiments are required to confirm that the DsrAB-encoding *Acidobacteria* couple  
426 degradation of carbohydrate polymers or monomers to sulfate reduction.

427 It is intriguing to propose that MAGs SbA2, SbA3, and SbA7 derive from acidobacterial SRM as  
428 they lack known sulfur oxidation genes, except *dsrL*, and express fully functional dissimilatory  
429 sulfate reduction pathways (Supplementary Table S2a), including reductive, bacterial-type  
430 *dsrAB*, and *dsrD* that may be exclusive to SRM (Hittel and Voordouw, 2000; Dahl and Friedrich,

431 2008; Ghosh and Dam, 2009; Rabus *et al.*, 2015). An alternative hypothesis, however, is that  
432 these novel *Acidobacteria* reverse the sulfate reduction pathway for dissimilatory sulfur  
433 oxidation or sulfur disproportionation, as was recently shown for the deltaproteobacterium  
434 *Desulfurivibrio alkaliphilus* (Thorup *et al.*, 2017). *D. alkaliphilus* also lacks known sulfur oxidation  
435 genes, except for *sqr*, and grows by coupling sulfide oxidation via an SRM-like pathway (with a  
436 reductive-type DsrAB) to the dissimilatory reduction of nitrate/nitrite to ammonium. Sulfide  
437 oxidation in acidobacterial MAGs SbA2, SbA3, and SbA7 could proceed analogous to the  
438 pathway models by Thorup *et al.* (2017) and Christiane Dahl (Dahl, 2017). Briefly, hydrogen  
439 sulfide might react with DsrC either spontaneously (Ijssennagger *et al.*, 2015) or via an unknown  
440 sulfur transfer mechanism to form persulfated DsrC. Persulfated DsrC is then oxidized by  
441 DsrMKJOP, thereby transferring electrons into the membrane quinone pool, and releasing a  
442 DsrC-trisulfide, which is the substrate for DsrAB (Santos *et al.*, 2015; Dahl, 2017). It was  
443 hypothesized that electrons released during DsrC-trisulfide oxidation to sulfite and DsrC are  
444 transferred to DsrL (Dahl, 2017). Sulfite oxidation to sulfate would be catalyzed by AprBA-  
445 QmoABC and Sat.

446 The acidobacterial MAGs have the genomic potential to use oxygen as terminal electron  
447 acceptor and might thus couple sulfide oxidation to aerobic respiration. Alternative electron  
448 acceptors for biological sulfur oxidation in wetlands could include nitrate/nitrite and metals such  
449 as Fe(III) (Küsel *et al.*, 2008). However, known genes for dissimilatory nitrate reduction and  
450 metal reduction (Weber *et al.*, 2006) were absent from these acidobacterial MAGs. Only SbA2  
451 encodes a putative metal reduction complex that was recently characterized in  
452 *Desulfotomaculum reducens* (Otwell *et al.*, 2015). At this time, it is unclear whether DsrAB-  
453 encoding *Acidobacteria* are capable of Fe(III) respiration, as seen in *Geothrix fermentans*  
454 (Coates *et al.*, 1999) and certain isolates in subdivision 1 (Blöthe *et al.*, 2008; Kulichevskaya *et*  
455 *al.*, 2014).

456 **Proposal of uncultivated acidobacterial genera**  
457 ***<sup>U</sup>Sulfotelmatobacter*, *<sup>U</sup>Sulfotelmatomonas*, and *<sup>U</sup>Sulfopaludibacter***  
458 Based on combined interpretation of phylogeny (concatenated phylogenetic marker genes,  
459 DsrAB), genomic (ANI, AAI) and genetic (DsrAB) distances, and characteristic genomic features  
460 of dissimilatory sulfur metabolism (Figure 3), in accordance with Konstantinidis *et al.* (2017), we  
461 classify MAGs SbA1, SbA7, SbA5, SbA3, SbA4, and SbA6 into three new acidobacterial  
462 uncultivated genera, including uncultivated species names for the >95% complete MAGs SbA1  
463 and SbA5. In-depth phylogenomic analysis of SbA2 was not possible and therefore it is  
464 tentatively assigned to *Acidobacteria* subdivision 3.

465 *Acidobacteria* subdivision 1

- 466 • Uncultivated genus *<sup>U</sup>Sulfotelmatobacter* (Sul.fo.tel.ma.to.bac'ter. L. n. *sulfur*, sulfur; Gr. n.  
467 *telma*, -tos, swamp, wetland; N.L. masc. n. *bacter*, bacterium; N.L. masc. n.  
468 *Sulfotelmatobacter*, a bacterium with a dissimilatory sulfur metabolism from a swamp)  
469 with *<sup>U</sup>Sulfotelmatobacter kueseliae* MAG SbA1 (kue.se'li.ae. N.L. gen. n. *kueseliae*, of  
470 Kuesel, honouring Kirsten Küsel, for her work on the geomicrobiology of wetlands) and  
471 *<sup>U</sup>Sulfotelmatobacter* sp. MAG SbA7.
- 472 • *<sup>U</sup>Sulfotelmatomonas gaucii* MAG SbA5 (Sul.fo.tel.ma.to.mo.nas. L. n. *sulfur*, sulfur; Gr. n.  
473 *telma*, -tos, swamp, wetland; N.L. masc. n. *monas*, unicellular organism; N.L. masc. n.  
474 *Sulfotelmatomonas*, a bacterium with a dissimilatory sulfur metabolism from a swamp;  
475 gau'.ci.i. N.L. gen. n. *gaucii*, of Gauci, in honour of Vincent Gauci, for his pioneering work  
476 on the interplay of wetland sulfate reduction and global methane emission).

477 *Acidobacteria* subdivision 3

- 478 • Uncultivated genus *<sup>U</sup>Sulfopaludibacter* (Sul.fo.pa.lu.di.bac'ter. L. n. *sulfur*, sulfur; L. n.  
479 *palus*, -udis, L. swamp; N.L. masc. n. *bacter*, bacterium; N.L. masc. n. *Sulfopaludibacter*, a  
480 bacterium with a dissimilatory sulfur metabolism from a swamp) with *<sup>U</sup>Sulfopaludibacter*  
481 sp. MAG SbA3, *<sup>U</sup>Sulfopaludibacter* sp. MAG SbA4, and *<sup>U</sup>Sulfopaludibacter* sp. MAG SbA6.
- 482 • *Acidobacteria* bacterium sp. MAG SbA2.

## 483 Conclusion

484 Sulfur cycling exerts important control on organic carbon degradation and greenhouse gas  
485 production in wetlands, but knowledge about sulfur microorganisms in these globally important  
486 ecosystems is scarce (Pester *et al.*, 2012). Here, we show for the first time, using genome-  
487 centric metagenomics and metatranscriptomics, that members of the phylum *Acidobacteria*  
488 have a putative role in peatland sulfur cycling. The genomic repertoire of the novel  
489 *Acidobacteria* species encompassed recognized acidobacterial physiologies, such as facultative  
490 anaerobic metabolism, oxygen respiration, fermentation, carbohydrate degradation, and  
491 hydrogen metabolism, but was additionally augmented with a DsrAB-based dissimilatory sulfur  
492 metabolism (Figure 5). Integrating findings of sulfur oxidation in SRM and on reversibility of the  
493 dissimilatory sulfate reduction pathway (Dannenbergh *et al.*, 1992; Fuseler and Cypionka, 1995;  
494 Fuseler *et al.*, 1996; Thorup *et al.*, 2017) and co-occurrence of *dsrD* and *dsrL*, genes that are  
495 considered characteristic for either sulfate reduction or sulfur oxidation (Dahl and Friedrich,  
496 2008; Rabus *et al.*, 2015), it is conceivable that the peatland *Acidobacteria* use the same  
497 pathway for both sulfate reduction and sulfide oxidation. Some members that only encoded the

498 pathway for dissimilatory sulfite reduction had additional genes for sulfite-producing enzymes,  
499 suggesting that organosulfonates may be a primary substrate for sulfur respiration. Our results  
500 extend our understanding of the genetic versatility and distribution of dissimilatory sulfur  
501 metabolism among recognized microbial phyla, but also underpin the challenge to  
502 unambiguously differentiate between reductive or oxidative sulfur metabolism solely based on  
503 (meta-)genome/transcriptome data (Thorup *et al.*, 2017).

## 504 **Conflict of Interest**

505 The authors declare no conflict of interest.

## 506 **Acknowledgements**

507 We are grateful to Norbert Bittner for support during field sampling, Doris Steger and Pinsurang  
508 Deevong for their contributions to qPCR analysis, and Florian Goldenberg for maintaining the  
509 Life Science Computer Cluster at the Division of Computational Systems Biology (University of  
510 Vienna). We thank the staff of the Joint Genome Institute (JGI) for metagenome and  
511 metatranscriptome library preparation, sequencing, and standard bioinformatics support,  
512 Bernhard Schink for help in naming of bacterial taxa, and Christiane Dahl, Petra Pjevac, Marc  
513 Mußmann, and Kenneth Wasmund for valuable discussions and feedback. We acknowledge  
514 LABGeM and the National Infrastructure France Genomique for providing the MicroScope MaGe  
515 platform. The work conducted by the JGI was supported by the Office of Science of the U.S.  
516 Department of Energy under Contract No. DE-AC02-05CH11231. This research was supported by  
517 the Austrian Science Fund (FWF, P23117-B17, P25111-B22, P26392-B20, and I1628-B22), the JGI  
518 (CSP 605), the German Research Foundation (DFG, PE 2147/1-1), and the European Union (FP7-  
519 People-2013-CIG, Grant No PCIG14-GA-2013-630188).

## 520 **References**

- 521 Albertsen M, Hugenholtz P, Skarshewski A, Nielsen KL, Tyson GW, Nielsen PH. (2013). Genome  
522 sequences of rare, uncultured bacteria obtained by differential coverage binning of multiple  
523 metagenomes. *Nat Biotechnol* **31**: 533–538.
- 524 Barns SM, Cain EC, Sommerville L, Kuske CR. (2007). *Acidobacteria* phylum sequences in  
525 uranium-contaminated subsurface sediments greatly expand the known diversity within the  
526 phylum. *Appl Environ Microbiol* **73**: 3113–3116.
- 527 Blagodatskaya E, Kuzyakov Y. (2008). Mechanisms of real and apparent priming effects and their  
528 dependence on soil microbial biomass and community structure: critical review. *Biol Fertil Soils*  
529 **45**: 115–131.



- 530 Blöthe M, Akob DM, Kostka JE, Göschel K, Drake HL, Küsel K. (2008). pH gradient-induced  
531 heterogeneity of Fe(III)-reducing microorganisms in coal mining-associated lake sediments. *Appl*  
532 *Environ Microbiol* **74**: 1019–1029.
- 533 Bodé S, Fancy R, Boeckx P. (2013). Stable isotope probing of amino sugars – a promising tool to  
534 assess microbial interactions in soils. *Rapid Commun Mass Spectrom* **27**: 1367–1379.
- 535 Brown CT, Olm MR, Thomas BC, Banfield JF. (2016). Measurement of bacterial replication rates in  
536 microbial communities. *Nat Biotechnol* **34**: 1256–1263.
- 537 Coates JD, Ellis DJ, Gaw CV, Lovley DR. (1999). *Geothrix fermentans* gen. nov., sp. nov., a novel  
538 Fe(III)-reducing bacterium from a hydrocarbon-contaminated aquifer. *Int J Syst Bacteriol* **49**:  
539 1615–1622.
- 540 Cord-Ruwisch R, Ollivier B, Garcia J-L. (1986). Fructose degradation by *Desulfovibrio* sp. in pure  
541 culture and in coculture with *Methanospirillum hungatei*. *Curr Microbiol* **13**: 285–289.
- 542 Costello EK, Schmidt SK. (2006). Microbial diversity in alpine tundra wet meadow soil: novel  
543 Chloroflexi from a cold, water-saturated environment. *Environ Microbiol* **8**: 1471–1486.
- 544 Crowe MA, Power JF, Morgan XC, Dunfield PF, Lagutin K, Rijpstra IC *et al.* (2014). *Pyrinomonas*  
545 *methylaliphatogenes* gen. nov., sp. nov., a novel group 4 thermophilic member of the phylum  
546 *Acidobacteria* from geothermal soils. *Int J Syst Evol Microbiol* **64**: 220–227.
- 547 Dahl C. (2017). Sulfur metabolism in phototrophic bacteria. In: Hallenbeck PC (ed). *Modern*  
548 *topics in the phototrophic prokaryotes*. Springer, pp 27–66.
- 549 Dahl C, Engels S, Pott-Sperling AS, Schulte A, Sander J, Lübbe Y *et al.* (2005). Novel genes of the  
550 *dsr* gene cluster and evidence for close interaction of Dsr proteins during sulfur oxidation in the  
551 phototrophic sulfur bacterium *Allochromatium vinosum*. *J Bacteriol* **187**: 1392–1404.
- 552 Dahl C, Friedrich CG. (2008). *Microbial Sulfur Metabolism*. Springer, Berlin Heidelberg.
- 553 Dannenberg S, Kroder M, Dilling W, Cypionka H. (1992). Oxidation of H<sub>2</sub>, organic compounds and  
554 inorganic sulfur compounds coupled to reduction of O<sub>2</sub> or nitrate by sulfate-reducing bacteria.  
555 *Arch Microbiol* **158**: 93–99.
- 556 Dedysh SN. (2011). Cultivating uncultured bacteria from northern wetlands: knowledge gained  
557 and remaining gaps. *Front Microbiol* **2**: 184.
- 558 Dedysh SN, Kulichevskaya IS, Serkebaeva YM, Mityaeva MA, Sorokin VV, Suzina NE *et al.* (2012).  
559 *Bryocella elongata* gen. nov., sp. nov., a member of subdivision 1 of the *Acidobacteria* isolated

- 560 from a methanotrophic enrichment culture, and emended description of *Edaphobacter*  
561 *aggregans* Koch *et al.* 2008. *Int J Syst Evol Microbiol* **62**: 654–664.
- 562 Dedysh SN, Pankratov TA, Belova SE, Kulichevskaya IS, Liesack W. (2006). Phylogenetic analysis  
563 and in situ identification of *Bacteria* community composition in an acidic *Sphagnum* peat bog.  
564 *Appl Environ Microbiol* **72**: 2110–2117.
- 565 Denger K, Cook AM. (2010). Racemase activity effected by two dehydrogenases in sulfolactate  
566 degradation by *Chromohalobacter salexigens*: purification of (S)-sulfolactate dehydrogenase.  
567 *Microbiology* **156**: 967–974.
- 568 Eddy SR. (2011). Accelerated profile HMM searches. *PLoS Comput Biol* **7**: e1002195.
- 569 Eichorst SA, Breznak JA, Schmidt TM. (2007). Isolation and characterization of soil bacteria that  
570 define *Terriglobus* gen. nov., in the phylum *Acidobacteria*. *Appl Environ Microbiol* **73**: 2708–  
571 2717.
- 572 Eichorst SA, Kuske CR, Schmidt TM. (2011). Influence of plant polymers on the distribution and  
573 cultivation of bacteria in the phylum *Acidobacteria*. *Appl Environ Microbiol* **77**: 586–596.
- 574 Fuseler K, Cypionka H. (1995). Elemental sulfur as an intermediate of sulfide oxidation with  
575 oxygen by *Desulfobulbus propionicus*. *Arch Microbiol* **164**: 104–109.
- 576 Fuseler K, Krekeler D, Sydow U, Cypionka H. (1996). A common pathway of sulfide oxidation by  
577 sulfate-reducing bacteria. *FEMS Microbiol Lett* **144**: 129–134.
- 578 Garcia Costas AM, Liu Z, Tomsho LP, Schuster SC, Ward DM, Bryant DA. (2012). Complete  
579 genome of *Candidatus Chloracidobacterium thermophilum*, a chlorophyll-based  
580 photoheterotroph belonging to the phylum *Acidobacteria*. *Environ Microbiol* **14**: 177–190.
- 581 Ghosh W, Dam B. (2009). Biochemistry and molecular biology of lithotrophic sulfur oxidation by  
582 taxonomically and ecologically diverse bacteria and archaea. *FEMS Microbiol Rev* **33**: 999–1043.
- 583 Giuffrè A, Borisov VB, Arese M, Sarti P, Forte E. (2014). Cytochrome *bd* oxidase and bacterial  
584 tolerance to oxidative and nitrosative stress. *Biochim Biophys Acta* **1837**: 1178–1187.
- 585 Greening C, Biswas A, Carere CR, Jackson CJ, Taylor MC, Stott MB *et al.* (2016). Genomic and  
586 metagenomic surveys of hydrogenase distribution indicate H<sub>2</sub> is a widely utilised energy source  
587 for microbial growth and survival. *ISME J* **10**: 761–777.
- 588 Greening C, Carere CR, Rushton-Green R, Harold LK, Hards K, Taylor MC *et al.* (2015).  
589 Persistence of the dominant soil phylum *Acidobacteria* by trace gas scavenging. *Proc Natl Acad*

590 *Sci USA* **112**: 10497–10502.

591 Hausmann B, Knorr K-H, Schreck K, Tringe SG, Glavina del Rio T, Loy A *et al.* (2016). Consortia of  
592 low-abundance bacteria drive sulfate reduction-dependent degradation of fermentation  
593 products in peat soil microcosms. *The ISME Journal* **10**: 2365–2375.

594 Hillesland KL, Lim S, Flowers JJ, Turkarslan S, Pinel N, Zane GM *et al.* (2014). Erosion of functional  
595 independence early in the evolution of a microbial mutualism. *Proc Natl Acad Sci USA* **111**:  
596 14822–14827.

597 Hittel DS, Voordouw G. (2000). Overexpression, purification and immunodetection of DsrD from  
598 *Desulfovibrio vulgaris* Hildenborough. *Antonie Van Leeuwenhoek* **77**: 271–280.

599 Holkenbrink C, Barbas SO, Mellerup A, Otaki H, Frigaard N-U. (2011). Sulfur globule oxidation in  
600 green sulfur bacteria is dependent on the dissimilatory sulfite reductase system. *Microbiology*  
601 **157**: 1229–1239.

602 Huber KJ, Geppert AM, Wanner G, Fösel BU, Wüst PK, Overmann J. (2016). The first  
603 representative of the globally widespread subdivision 6 *Acidobacteria*, *Vicinamibacter silvestris*  
604 gen. nov., sp. nov., isolated from subtropical savannah soil. *Int J Syst Evol Microbiol* **66**: 2971–  
605 2979.

606 Huber KJ, Wüst PK, Rohde M, Overmann J, Foesel BU. (2014). *Aridibacter famidurans* gen. nov.,  
607 sp. nov. and *Aridibacter kavangonensis* sp. nov., two novel members of subdivision 4 of the  
608 *Acidobacteria* isolated from semiarid savannah soil. *Int J Syst Evol Microbiol* **64**: 1866–1875.

609 Huerta-Cepas J, Szklarczyk D, Forslund K, Cook H, Heller D, Walter MC *et al.* (2016). eggNOG 4.5:  
610 a hierarchical orthology framework with improved functional annotations for eukaryotic,  
611 prokaryotic and viral sequences. *Nucleic Acids Res* **44**: D286–D293.

612 Hug La, Thomas BC, Sharon I, Brown CT, Sharma R, Hettich RL *et al.* (2016). Critical  
613 biogeochemical functions in the subsurface are associated with bacteria from new phyla and  
614 little studied lineages. *Environ Microbiol* **18**: 159–173.

615 Hyatt D, Chen G-L, Locascio PF, Land ML, Larimer FW, Hauser LJ. (2010). Prodigal: prokaryotic  
616 gene recognition and translation initiation site identification. *BMC Bioinformatics* **11**: 119.

617 Ijssennagger N, Belzer C, Hooiveld GJ, Dekker J, van Mil SWC, Müller M *et al.* (2015). Gut  
618 microbiota facilitates dietary heme-induced epithelial hyperproliferation by opening the mucus  
619 barrier in colon. *Proc Natl Acad Sci USA* **112**: 10038–10043.

620 Ivanova AA, Wegner C-E, Kim Y, Liesack W, Dedysh SN. (2016). Identification of microbial

- 621 populations driving biopolymer degradation in acidic peatlands by metatranscriptomic analysis.  
622 *Mol Ecol* **25**: 4818–4835.
- 623 Izumi H, Nunoura T, Miyazaki M, Mino S, Toki T, Takai K *et al.* (2012). *Thermotomaculum*  
624 *hydrothermale* gen. nov., sp. nov., a novel heterotrophic thermophile within the phylum  
625 *Acidobacteria* from a deep-sea hydrothermal vent chimney in the Southern Okinawa Trough.  
626 *Extremophiles* **16**: 245–253.
- 627 Janssen PH. (2006). Identifying the dominant soil bacterial taxa in libraries of 16S rRNA and 16S  
628 rRNA genes. *Appl Environ Microbiol* **72**: 1719–1728.
- 629 Juottonen H, Eiler A, Biasi C, Tuittila E-S, Yrjälä K, Fritze H. (2017). Distinct anaerobic bacterial  
630 consumers of cellobiose-derived carbon in boreal fens with different CO<sub>2</sub>/CH<sub>4</sub> production ratios.  
631 *Appl Environ Microbiol* **83**: e02533–16.
- 632 Kirschke S, Bousquet P, Ciais P, Saunois M, Canadell JG, Dlugokencky EJ *et al.* (2013). Three  
633 decades of global methane sources and sinks. *Nat Geosci* **6**: 813–823.
- 634 Knorr K-H, Blodau C. (2009). Impact of experimental drought and rewetting on redox  
635 transformations and methanogenesis in mesocosms of a northern fen soil. *Soil Biol Biochem* **41**:  
636 1187–1198.
- 637 Konstantinidis KT, Rosselló-Móra R, Amann R. (2017). Uncultivated microbes in need of their own  
638 taxonomy. *ISME J*. doi:<https://doi.org/10.1038/ismej.2017.113>[10.1038/ismej.2017.113].
- 639 Kraigher B, Stres B, Hacin J, Ausec L, Mahne I, van Elsas JD *et al.* (2006). Microbial activity and  
640 community structure in two drained fen soils in the Ljubljana Marsh. *Soil Biol Biochem* **38**: 2762–  
641 2771.
- 642 Kulichevskaya IS, Suzina NE, Liesack W, Dedysh SN. (2010). *Bryobacter aggregatus* gen. nov.,  
643 sp. nov., a peat-inhabiting, aerobic chemo-organotroph from subdivision 3 of the *Acidobacteria*.  
644 *Int J Syst Evol Microbiol* **60**: 301–306.
- 645 Kulichevskaya IS, Suzina NE, Rijpstra WIC, Sinninghe Damsté JS, Dedysh SN. (2014).  
646 *Paludibaculum fermentans* gen. nov., sp. nov., a facultative anaerobe capable of dissimilatory  
647 iron reduction from subdivision 3 of the *Acidobacteria*. *Int J Syst Evol Microbiol* **64**: 2857–2864.
- 648 Küsel K, Blöthe M, Schulz D, Reiche M, Drake HL. (2008). Microbial reduction of iron and  
649 porewater biogeochemistry in acidic peatlands. *Biogeosciences* **5**: 1537–1549.
- 650 Langmead B, Salzberg SL. (2012). Fast gapped-read alignment with Bowtie 2. *Nat Methods* **9**:  
651 357–359.

- 652 Laska S, Lottspeich F, Kletzin A. (2003). Membrane-bound hydrogenase and sulfur reductase of  
653 the hyperthermophilic and acidophilic archaeon *Acidianus ambivalens*. *Microbiology* **149**: 2357-  
654 2371.
- 655 Lenk S, Moraru C, Hahnke S, Arnds J, Richter M, Kube M *et al.* (2012). *Roseobacter* clade bacteria  
656 are abundant in coastal sediments and encode a novel combination of sulfur oxidation genes.  
657 *ISME J* **6**: 2178-2187.
- 658 Liao Y, Smyth GK, Shi W. (2014). featureCounts: an efficient general purpose program for  
659 assigning sequence reads to genomic features. *Bioinformatics* **30**: 923-930.
- 660 Liesack W, Bak F, Kreft J-U, Stackebrandt E. (1994). *Holophaga foetida* gen. nov., sp. nov., a new,  
661 homoacetogenic bacterium degrading methoxylated aromatic compounds. *Arch Microbiol* **162**:  
662 85-90.
- 663 Losey NA, Stevenson BS, Busse H-J, Sinninghe Damsté JS, Rijpstra WIC, Rudd S *et al.* (2013).  
664 *Thermoanaerobaculum aquaticum* gen. nov., sp. nov., the first cultivated member of  
665 *Acidobacteria* subdivision 23, isolated from a hot spring. *Int J Syst Evol Microbiol* **63**: 4149-4157.
- 666 Love MI, Huber W, Anders S. (2014). Moderated estimation of fold change and dispersion for  
667 RNA-seq data with DESeq2. *Genome Biol* **15**: 550.
- 668 Loy A, Küsel K, Lehner A, Drake HL, Wagner M. (2004). Microarray and functional gene analyses  
669 of sulfate-reducing prokaryotes in low-sulfate, acidic fens reveal cooccurrence of recognized  
670 genera and novel lineages. *Appl Environ Microbiol* **70**: 6998-7009.
- 671 Lübbe YJ, Youn H-S, Timkovich R, Dahl C. (2006). Siro(haem)amide in *Allochromatium vinosum*  
672 and relevance of DsrL and DsrN, a homolog of cobyrinic acid *a,c*-diamide synthase, for sulphur  
673 oxidation. *FEMS Microbiol Lett* **261**: 194-202.
- 674 Meyer B, Imhoff JF, Kuever J. (2007). Molecular analysis of the distribution and phylogeny of the  
675 *soxB* gene among sulfur-oxidizing bacteria: evolution of the Sox sulfur oxidation enzyme  
676 system. *Environ Microbiol* **9**: 2957-2977.
- 677 Müller AL, Kjeldsen KU, Rattei T, Pester M, Loy A. (2015). Phylogenetic and environmental  
678 diversity of DsrAB-type dissimilatory (bi)sulfite reductases. *ISME J* **9**: 1152-1165.
- 679 Myers MR, King GM. (2016). Isolation and characterization of *Acidobacterium ailaui* sp. nov., a  
680 novel member of *Acidobacteria* subdivision 1, from a geothermally heated Hawaiian microbial  
681 mat. *Int J Syst Evol Microbiol* **66**: 5328-5335.
- 682 Otwell AE, Sherwood RW, Zhang S, Nelson OD, Li Z, Lin H *et al.* (2015). Identification of proteins

- 683 capable of metal reduction from the proteome of the Gram-positive bacterium  
684 *Desulfotomaculum reducens* MI-1 using an NADH-based activity assay. *Environ Microbiol* **17**:  
685 1977-1990.
- 686 Pankratov TA, Dedysh SN. (2010). *Granulicella paludicola* gen. nov., sp. nov., *Granulicella*  
687 *pectinivorans* sp. nov., *Granulicella aggregans* sp. nov. and *Granulicella rosea* sp. nov.,  
688 acidophilic, polymer-degrading acidobacteria from *Sphagnum* peat bogs. *Int J Syst Evol*  
689 *Microbiol* **60**: 2951-2959.
- 690 Pankratov TA, Ivanova AO, Dedysh SN, Liesack W. (2011). Bacterial populations and  
691 environmental factors controlling cellulose degradation in an acidic *Sphagnum* peat. *Environ*  
692 *Microbiol* **13**: 1800-1814.
- 693 Pankratov TA, Kirsanova LA, Kaparullina EN, Kevbrin VV, Dedysh SN. (2012). *Telmatobacter*  
694 *bradus* gen. nov., sp. nov., a cellulolytic facultative anaerobe from subdivision 1 of the  
695 *Acidobacteria*, and emended description of *Acidobacterium capsulatum* Kishimoto *et al.* 1991.  
696 *Int J Syst Evol Microbiol* **62**: 430-437.
- 697 Parks DH, Imelfort M, Skennerton CT, Hugenholtz P, Tyson GW. (2015). CheckM: assessing the  
698 quality of microbial genomes recovered from isolates, single cells, and metagenomes. *Genome*  
699 *Res* **25**: 1043-1055.
- 700 Pereira IAC, Ramos AR, Grein F, Marques MC, Marques da Silva S, Venceslau SS. (2011). A  
701 comparative genomic analysis of energy metabolism in sulfate reducing bacteria and archaea.  
702 *Front Microbiol* **2**: 69.
- 703 Pester M, Bittner N, Deevong P, Wagner M, Loy A. (2010). A 'rare biosphere' microorganism  
704 contributes to sulfate reduction in a peatland. *ISME J* **4**: 1591-1602.
- 705 Pester M, Knorr K-H, Friedrich MW, Wagner M, Loy A. (2012). Sulfate-reducing microorganisms in  
706 wetlands - fameless actors in carbon cycling and climate change. *Front Microbiol* **3**: 72.
- 707 Rabus R, Hansen TA, Widdel F. (2013). Dissimilatory sulfate- and sulfur-reducing prokaryotes. In:  
708 Rosenberg E, DeLong EF, Lory S, Stackebrandt E, Thompson F (eds). *The Prokaryotes -*  
709 *prokaryotic physiology and biochemistry*. Springer Berlin Heidelberg, pp 309-404.
- 710 Rabus R, Venceslau SS, Wöhlbrand L, Voordouw G, Wall JD, Pereira IAC. (2015). A post-genomic  
711 view of the ecophysiology, catabolism and biotechnological relevance of sulphate-reducing  
712 prokaryotes. *Adv Microb Physiol* **66**: 55-321.
- 713 Ramel F, Amrani A, Pieulle L, Lamrabet O, Voordouw G, Seddiki N *et al.* (2013). Membrane-

- 714 bound oxygen reductases of the anaerobic sulfate-reducing *Desulfovibrio vulgaris*  
715 Hildenborough: roles in oxygen defence and electron link with periplasmic hydrogen oxidation.  
716 *Microbiology* **159**: 2663–2673.
- 717 Rawat SR, Männistö MK, Bromberg Y, Häggblom MM. (2012). Comparative genomic and  
718 physiological analysis provides insights into the role of *Acidobacteria* in organic carbon  
719 utilization in Arctic tundra soils. *FEMS Microbiol Ecol* **82**: 341–355.
- 720 Rodriguez-R LM, Konstantinidis KT. (2014). Bypassing cultivation to identify bacterial species.  
721 *Microbe Mag* **9**: 111–118.
- 722 Santos AA, Venceslau SS, Grein F, Leavitt WD, Dahl C, Johnston DT *et al.* (2015). A protein  
723 trisulfide couples dissimilatory sulfate reduction to energy conservation. *Science* **350**: 1541–  
724 1545.
- 725 Saunio M, Bousquet P, Poulter B, Peregon A, Ciais P, Canadell JG *et al.* (2016). The global  
726 methane budget 2000–2012. *Earth Syst Sci Data* **8**: 697–751.
- 727 Sánchez-Andrea I, Rodríguez N, Amils R, Sanz JL. (2011). Microbial diversity in anaerobic  
728 sediments at Río Tinto, a naturally acidic environment with a high heavy metal content. *Appl*  
729 *Environ Microbiol* **77**: 6085–6093.
- 730 Schmalenberger A, Drake HL, Küsel K. (2007). High unique diversity of sulfate-reducing  
731 prokaryotes characterized in a depth gradient in an acidic fen. *Environ Microbiol* **9**: 1317–1328.
- 732 Schmidt O, Horn MA, Kolb S, Drake HL. (2015). Temperature impacts differentially on the  
733 methanogenic food web of cellulose-supplemented peatland soil. *Environ Microbiol* **17**: 720–  
734 734.
- 735 Serkebaeva YM, Kim Y, Liesack W, Dedysh SN. (2013). Pyrosequencing-based assessment of the  
736 *Bacteria* diversity in surface and subsurface peat layers of a northern wetland, with focus on  
737 poorly studied phyla and candidate divisions. *PLoS One* **8**: e63994.
- 738 Simon J, Kroneck PMH. (2013). Microbial sulfite respiration.
- 739 Steger D, Wentrup C, Braunegger C, Deevong P, Hofer M, Richter A *et al.* (2011).  
740 Microorganisms with novel dissimilatory (bi)sulfite reductase genes are widespread and part of  
741 the core microbiota in low-sulfate peatlands. *Appl Environ Microbiol* **77**: 1231–1242.
- 742 Stetter KO. (1988). *Archaeoglobus fulgidus* gen. nov., sp. nov.: a new taxon of extremely  
743 thermophilic archaeobacteria. *Syst Appl Microbiol* **10**: 172–173.

- 744 Tank M, Bryant DA. (2015). *Chloracidobacterium thermophilum* gen. nov., sp. nov.: an  
745 anoxygenic microaerophilic chlorophotoheterotrophic acidobacterium. *Int J Syst Evol Microbiol*  
746 **65**: 1426–1430.
- 747 Thorup C, Schramm A, Findlay AJ, Finster KW, Schreiber L. (2017). Disguised as a sulfate  
748 reducer: growth of the deltaproteobacterium *Desulfurivibrio alkaliphilus* by sulfide oxidation with  
749 nitrate. *MBio* **8**: e00671–17.
- 750 Tveit A, Schwacke R, Svenning MM, Urich T. (2013). Organic carbon transformations in high-  
751 Arctic peat soils: key functions and microorganisms. *ISME J* **7**: 299–311.
- 752 Urbanová Z, Bárta J. (2014). Microbial community composition and *in silico* predicted metabolic  
753 potential reflect biogeochemical gradients between distinct peatland types. *FEMS Microbiol Ecol*  
754 **90**: 633–646.
- 755 Vallenet D, Calteau A, Cruveiller S, Gachet M, Lajus A, Josso A *et al.* (2017). MicroScope in 2017:  
756 an expanding and evolving integrated resource for community expertise of microbial genomes.  
757 *Nucleic Acids Res* **45**: D517–D528.
- 758 Venceslau SS, Stockdreher Y, Dahl C, Pereira IAC. (2014). The ‘bacterial heterodisulfide’ DsrC is  
759 a key protein in dissimilatory sulfur metabolism. *Biochim Biophys Acta* **1837**: 1148–1164.
- 760 Wang Y, Sheng H-F, He Y, Wu J-Y, Jiang Y-X, Tam NF-Y *et al.* (2012). Comparison of the levels of  
761 bacterial diversity in freshwater, intertidal wetland, and marine sediments by using millions of  
762 illumina tags. *Appl Environ Microbiol* **78**: 8264–8271.
- 763 Ward NL, Challacombe JF, Janssen PH, Henrissat B, Coutinho PM, Wu M *et al.* (2009). Three  
764 genomes from the phylum *Acidobacteria* provide insight into the lifestyles of these  
765 microorganisms in soils. *Appl Environ Microbiol* **75**: 2046–2056.
- 766 Wasmund K, Mußmann M, Loy A. (2017). The life sulfuric: microbial ecology of sulfur cycling in  
767 marine sediments. *Environ Microbiol Rep*. doi:[https://doi.org/10.1111/1758-](https://doi.org/10.1111/1758-2229.12538)  
768 [2229.12538](https://doi.org/10.1111/1758-2229.12538)[10.1111/1758-2229.12538].
- 769 Watanabe T, Kojima H, Fukui M. (2016). Identity of major sulfur-cycle prokaryotes in freshwater  
770 lake ecosystems revealed by a comprehensive phylogenetic study of the dissimilatory  
771 adenylylsulfate reductase. *Sci Rep* **6**: 36262.
- 772 Weber KA, Achenbach LA, Coates JD. (2006). Microorganisms pumping iron: anaerobic microbial  
773 iron oxidation and reduction. *Nat Rev Microbiol* **4**: 752–764.
- 774 Weissgerber T, Sylvester M, Kröninger L, Dahl C. (2014). A comparative quantitative proteomic



- 775 study identifies new proteins relevant for sulfur oxidation in the purple sulfur bacterium  
776 *Allochromatium vinosum*. *Appl Environ Microbiol* **80**: 2279–2292.

## 777 **Figure legends**

### 778 **Figure 1**

779 Microbial community composition in Schlöppnerbrunnen II peatland in samples from different  
780 years and soil depths. (a) Abundance of phyla and proteobacterial classes in the native soil  
781 (relative to all classified reads/amplicons). Taxa less abundant than 1% are grouped in grey.  
782 Coverage abundance is based on metagenomic reads mapped to classified scaffolds. Amplicon  
783 abundance is based on *rrn* operon-copy number-corrected abundance of 16S rRNA gene  
784 operational taxonomic units (Hausmann *et al.*, 2016). (b) Relative abundance of acidobacterial  
785 subdivisions (SD) in the native soil samples as determined by 16S rRNA gene qPCR assays. In  
786 addition, all subdivisions more abundant than 1% in a 16S rRNA gene amplicon dataset are  
787 shown (Hausmann *et al.*, 2016).

### 788 **Figure 2**

789 Organization of dissimilatory sulfur metabolism genes on acidobacterial MAGs SbA1-7. Red: *sat*;  
790 orange: *aprBA*, *qmoABC*; green: *dsrABCMKJOPM2K2*; blue: *dsrD*; turquoise: *dsrL*; violet:  
791 *dsrNVWa*; pink: *suyAB*, *comC*, *slcC*; white: genes of unknown function or not involved in sulfur  
792 metabolism. In SbA2 all genes are on one scaffold (scaffold 01kb). Gene fragments at contig  
793 borders are indicated by an asterisk. *aprB* in SbA6, indicated by two asterisks, is truncated,  
794 which indicates a pseudogene or is due to an assembly error. Scaffolds are separated by two  
795 slashes.

### 796 **Figure 3**

797 Metabolic model as inferred from analysis of acidobacterial MAGs SbA1-7. Sulfur metabolism is  
798 highlighted in yellow. Enzymes and transporters are shown in blue font. Glycoside hydrolases  
799 are shown in pink font (Supplementary Table S2). Extracellular compounds are in parentheses. A  
800 slash (/) indicates isozymes, i.e., enzymes that perform the same function, but are distinctly  
801 different or have more than one established name. AcdA+B, MaeB+Pta, MeaB+Mce, Tal+Pgi:  
802 bifunctional fusion genes/proteins. Otherwise the plus sign (+) indicates protein complexes.  
803 TCA: tricarboxylic acid cycle. FDH: formate dehydrogenase. Hase: hydrogenase. NDH: NADH  
804 dehydrogenase. HCO: haem-copper oxidase. TO: terminal oxidase. KDG: 2-dehydro-3-deoxy-D-  
805 gluconate. KDGP: 2-dehydro-3-deoxy-D-gluconate 6-phosphate. Expression of at least one copy  
806 of every enzyme and transporter was observed in the incubation samples.

807 **Figure 4**

808 Glycoside hydrolase genes are enriched in acidobacterial genomes/MAGs compared to genomes  
809 from other taxa that encode DsrA/DsrB. DsrAB-containing MAGs SbA1–7 are shown as solid  
810 symbols and numbered accordingly. X-axis shows the total number of predicted CDS per  
811 genome/MAG.

812 **Figure 5**

813 Putative lifestyles of DsrAB-encoding *Acidobacteria*.

**Fig. 1.**

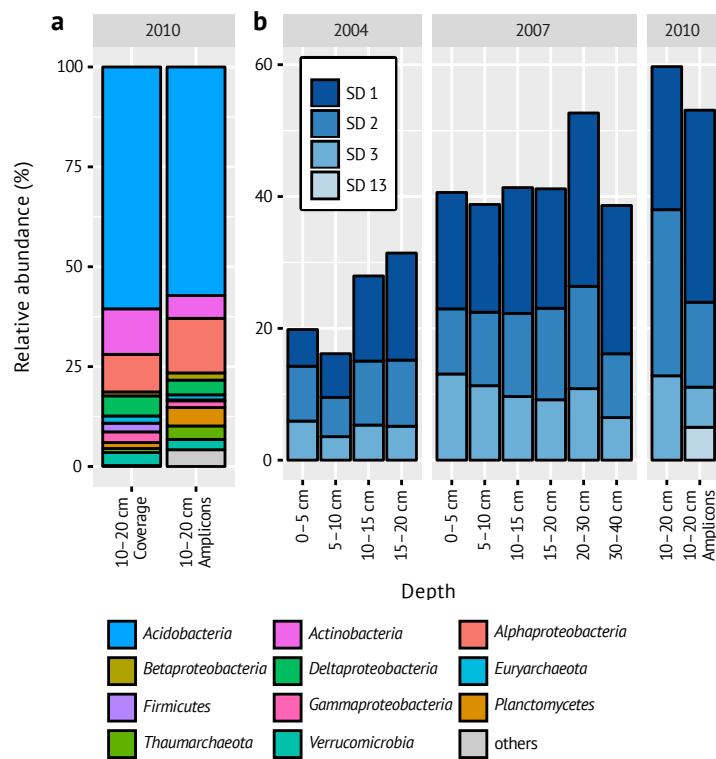

Fig. 2.

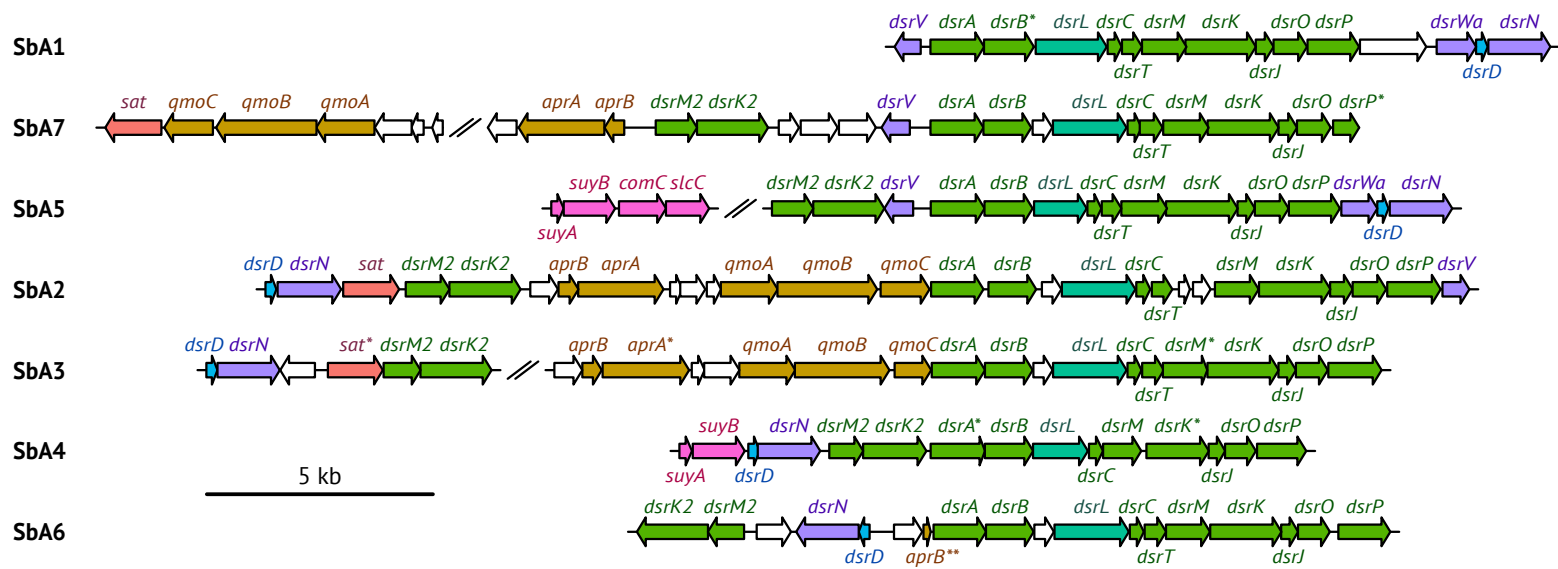

**Fig. 3.**

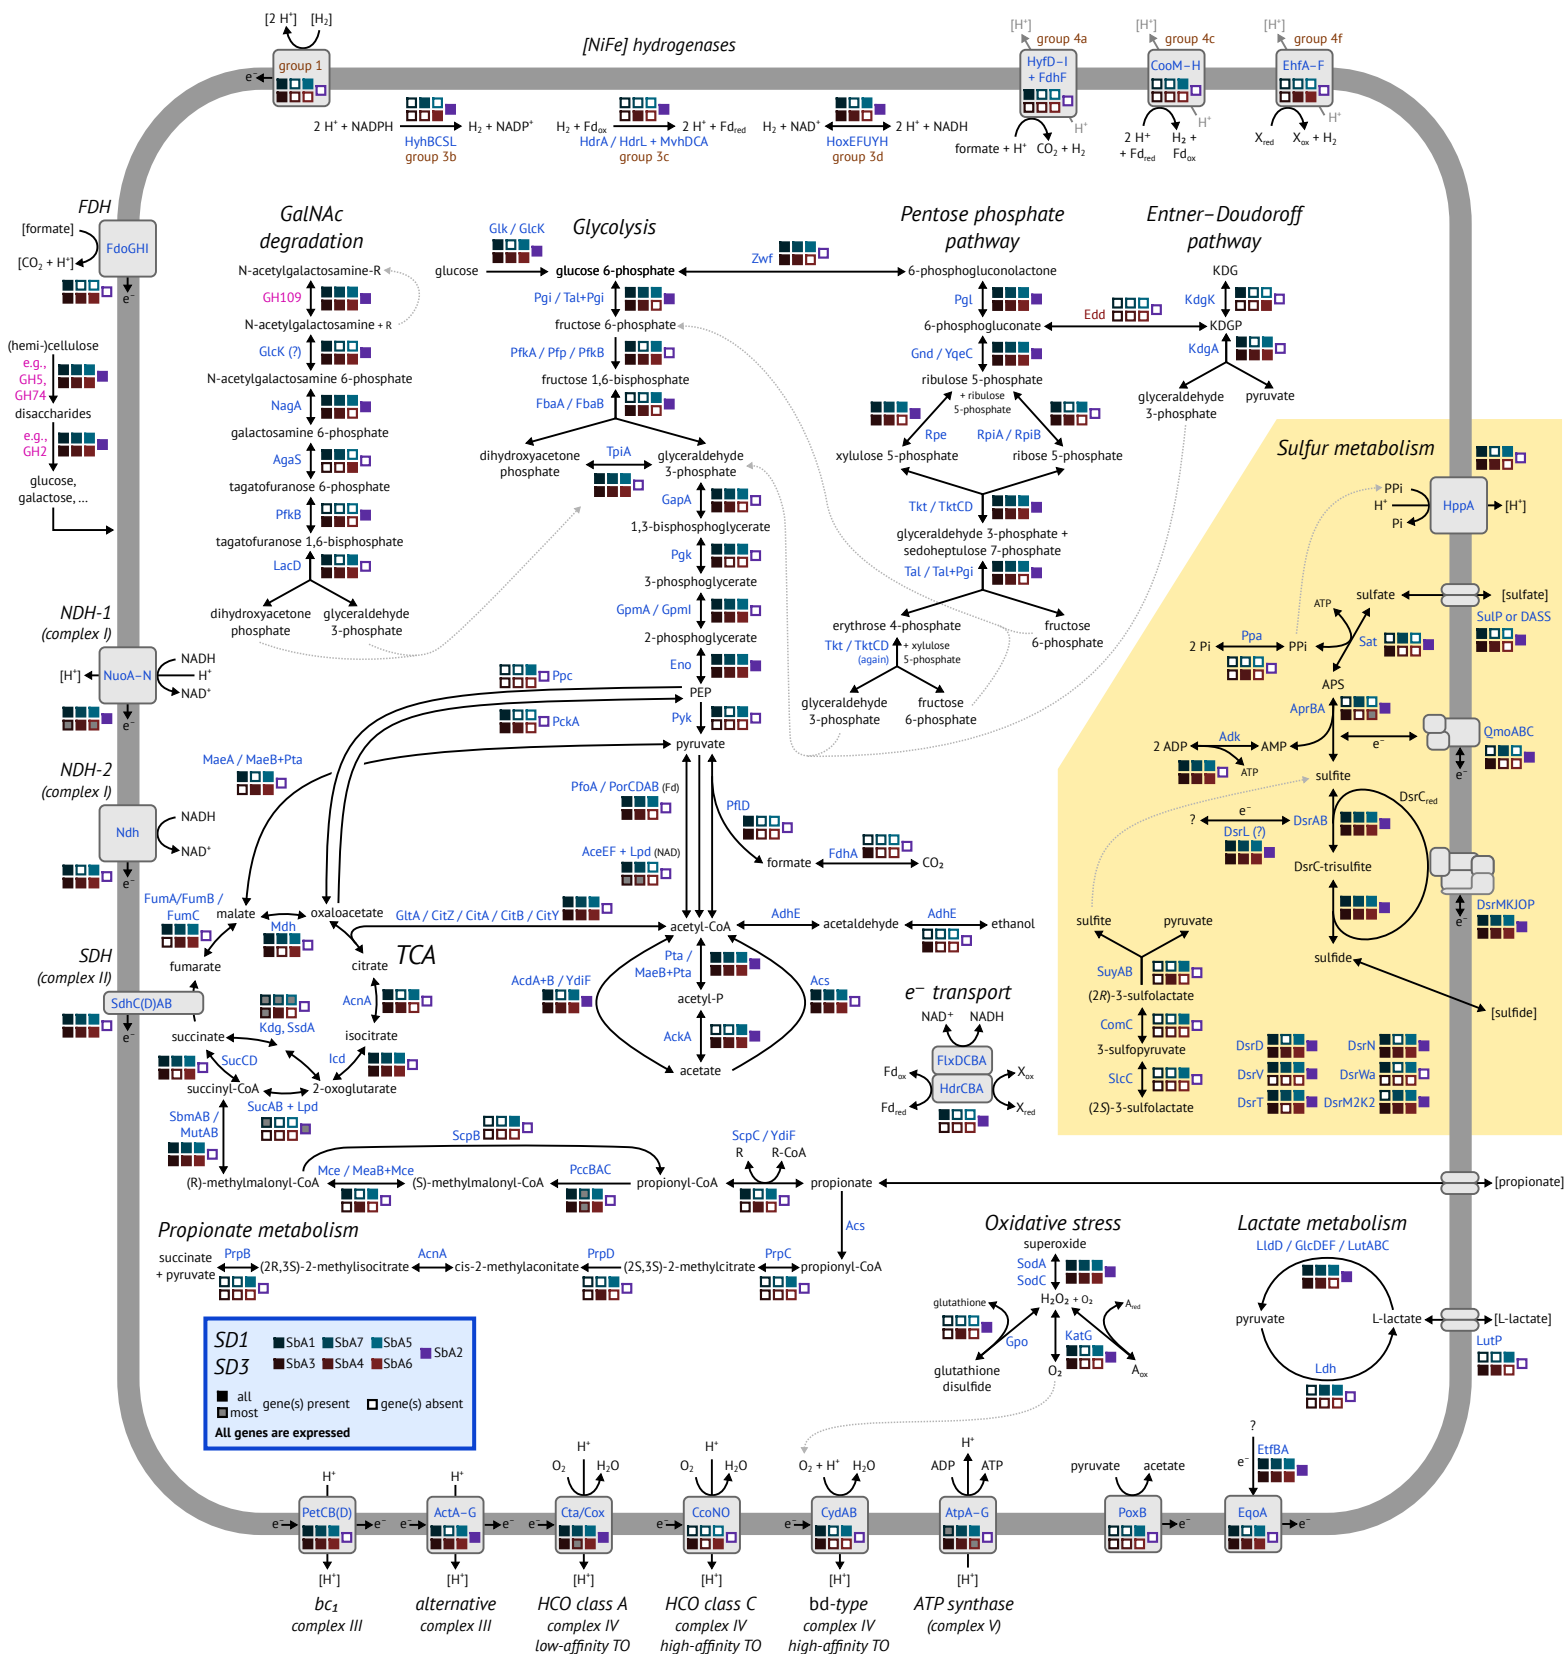

**Fig. 4.**

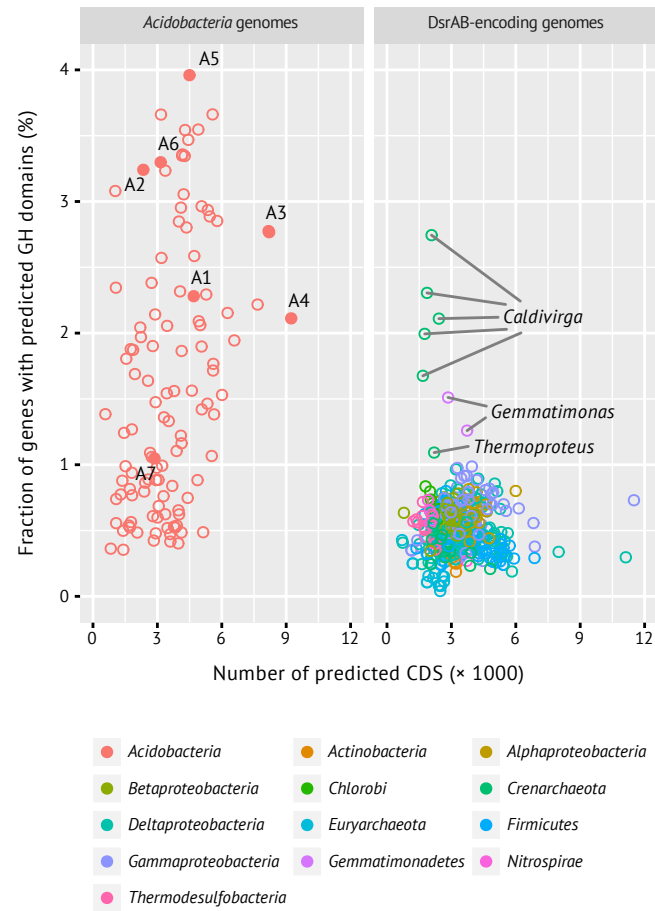

**Fig. 5.**

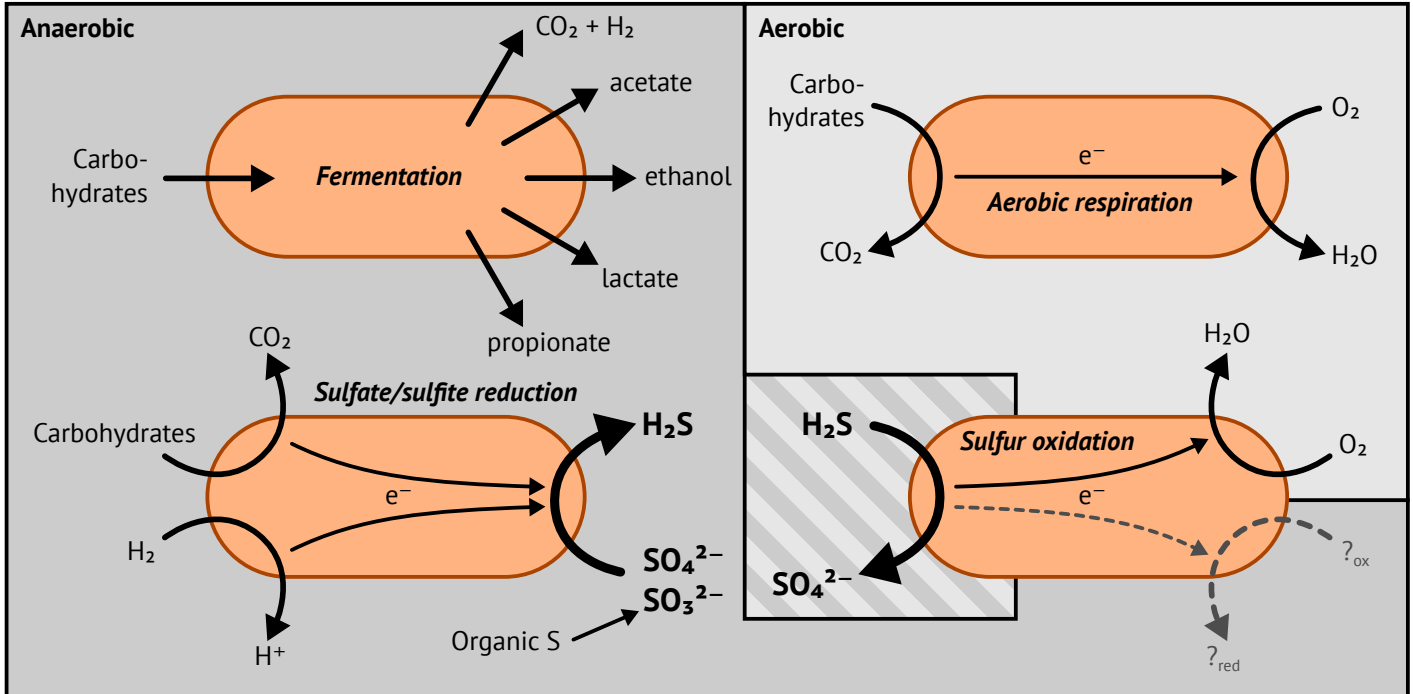



# 1 **Peatland *Acidobacteria* with a dissimilatory sulfur** 2 **metabolism: Supplementary Information**

## 3 **Supplementary Methods**

### 4 **Quantitative PCR analysis of acidobacterial subdivisions**

5 *Acidobacteria* subdivisions 1, 2, and 3 were separately quantified using 16S rRNA gene-targeted  
6 real-time quantitative PCR (qPCR) assays. Coverage of the subdivisions was estimated using the  
7 RDP ProbeMatch online tool with RDP Release 11, Update 5, good quality filter applied, requiring  
8 a full match to the probe sequence (Cole *et al.*, 2014). The following parameters ensure  
9 optimized efficiency and sensitivity of each qPCR assay. Subdivision 1: Acid303Fa/Acid303Fb (5'-  
10 GCG CAC GGM CAC ACT GGA-3'/5'-GCG CGC GGC CAC ACT GGA-3') and Acid657R (5'-ATT CCA  
11 CKC ACC TCT CCC AY-3'), 76%/0.1% coverage by primers pairs, primer concentration: 1000 nM,  
12 annealing temperature: 68.5 °C; Subdivision 2: Acid702Fa/Acid702Fb (5'-AGA TAT CTG CAG GAA  
13 CAY CC-3'/5'-AGA TAT CCG CAG GAA CAT CC-3') and Acid805R (5'-CTG ATS GTT TAG GGC TAG-3'),  
14 64%/7% coverage, primer concentration: 1000 nM, annealing temperature: 62.5 °C; Subdivision  
15 3: Acid306F (5'-CAC GGC CAC ACT GGC AC-3') and Acid493R (5'-AGT TAG CCG CAG CTK CTT CT-  
16 3'), 77% coverage, primer concentration: 500 nM, annealing temperature: 69 °C. Thermal  
17 cycling was carried out with an initial denaturation (94 °C) followed by 40–45 cycles of  
18 denaturation (94 °C, 40 s), annealing (68.5 °C, 62.5 °C, or 69 °C, 40 s), and elongation (72 °C,  
19 40–45 s). PCR efficiency with perfectly-matched reference targets was between 82–86% with an  
20 R<sup>2</sup> of 0.99 and a limit of detection at 100 target genes per reaction. For calculation of relative  
21 abundances, total bacterial and archeal 16S rRNA genes were quantified using a previously  
22 published qPCR assay (Pester *et al.*, 2010; Hausmann *et al.*, 2016).

### 23 **Metagenomic and metatranscriptomic sequencing**

24 DNA was sent to the JGI, where it was fragmented to a target length of 270 nt. Libraries were  
25 generated with the KAPA-Illumina library creation kit (KAPA biosystems) and sequenced on an  
26 Illumina HiSeq2000 sequencer. The native soil yielded 232 million 150 nt paired-end reads.  
27 Three sequencing libraries of the pooled DNA-SIP sample yielded 273, 52, and 350 million  
28 150 nt paired-end reads each. DNA from the native soil was also sent to the King Abdullah  
29 University of Science and Technology (Thuwal, Saudi Arabia), libraries prepared with the Nextera  
30 DNA Library Prep kit (Illumina), and sequenced on an Illumina HiSeq2000 sequencer (179 million  
31 101 nt paired-end reads).

32 Triplicate RNA samples from the native soil and from each incubation treatment and time point  
33 were sent to the JGI. When possible, rRNA was depleted using Ribo-Zero rRNA removal kit

34 (Epicentre). cDNA libraries were generated with the Truseq Stranded RNA LT kit (Illumina) and  
35 sequencing was performed on an Illumina HiSeq2000 sequencer. One propionate- and sulfate-  
36 stimulated replicate microcosm was excluded because of inconsistent response in sulfate  
37 turnover as compared to the other two replicates (Hausmann *et al.*, 2016), resulting in a total of  
38 73 samples with 27–188 million 150 nt paired-end reads.

### 39 **Gene- and genome-based taxonomic classification and phylogeny**

40 Phylogenetic reconstruction of DsrAB sequences was performed based on an established DsrAB  
41 alignment (Müller *et al.*, 2015). DsrAB amino acid sequences from the MAGs and unbinned  
42 scaffolds were aligned to the filtered seed alignment using MAFFT 7.271 (Kato and Standley,  
43 2013). *De novo* maximum likelihood trees were calculated with FastTree 2.1.9 using the LG  
44 model and 1000 resamplings (Price *et al.*, 2010). Phylogenetic distances of the DsrAB  
45 sequences of the MAGs and scaffolds to other DsrAB harbouring organisms were calculated with  
46 T-Coffee 11 (Notredame *et al.*, 2000) using the unfiltered reference alignment without the  
47 intergenic region (Müller *et al.*, 2015). Trees were visualized with iTOL (Letunic and Bork, 2016)  
48 and Inkscape (inkscape.org).

49 Representative genome assemblies from the phylum *Acidobacteria* and outgroups from the  
50 *Proteobacteria*, *Firmicutes*, and *Verrucomicrobia* were obtained from NCBI for phylogenomic  
51 analysis. A filtered and concatenated amino acid alignment of 34 phylogenetically informative  
52 marker genes was created using CheckM (Parks *et al.*, 2015). Phylobayes was used to calculate  
53 the tree with a CAT-GTR model (Lartillot *et al.*, 2009). Phylobayes was run in five independent  
54 chains for 11000 cycles each (corresponding to approx.  $6.8 \times 10^6$  tree generations per chain).  
55 The first 6000 cycles in each chain were discarded as burn in (corresponding to approx.  $3.7 \times 10^6$   
56 tree generations per chain).

57 Pairwise average nucleic and amino acid identities (ANI, AAI) between all protein-coding genes  
58 of each MAG and published reference genomes were calculated to estimate novelty (adapted  
59 from Varghese *et al.*, 2015). Two-way ANI and AAI were calculated based on reciprocal best blast  
60 hits filtered for sequence identity ( $\geq 70\%$  and  $\geq 30\%$  for ANI and AAI, respectively) and  
61 alignment length ( $\geq 70\%$  of the shorter sequence). Average identities and alignment fractions  
62 (AF) for each comparisons were calculated as outlined previously (Varghese *et al.*, 2015). None  
63 of the comparisons reached an ANI above the intra-species threshold of 96.5% (Varghese *et al.*,  
64 2015). Due to lack of a generic intra-genus AAI threshold, we used the existing acidobacterial  
65 taxonomy as a reference. Intra-genus AAI variability of published acidobacterial genera with  
66 more than one species (*Acidobacterium*, *Granulicella*, *Terriglobus*) ranged from 60–71%  
67 (alignment fraction 52–66%).

## 68 **Manually curated annotation of of DsrAB-encoding genomes**

69 All genes of interest were manually curated using MaGe (Vallenet *et al.*, 2017). This included  
70 assessment of best-BLAST-hits to reference genomes and UniProt entries (The UniProt  
71 Consortium, 2015), presence of the required functional domains (InterPro/InterProScan; Mitchell  
72 *et al.*, 2015; Jones *et al.*, 2014) and, if appropriate, transmembrane helices (TMhmm; Krogh *et*  
73 *al.*, 2001), membership in the correct COGs, and membership of syntenic regions (operons).  
74 COGs in MaGe are assigned using COGnitor ([www.ncbi.nlm.nih.gov/COG/](http://www.ncbi.nlm.nih.gov/COG/)) which are often too  
75 broad to be of use, therefore we additionally classified all coding DNA sequences (CDS) using  
76 the bactNOG database (eggNOG, Huerta-Cepas *et al.*, 2016). All possible HMM profiles were  
77 matched against every gene (E-value threshold 1) and only the best hit was extracted. This non-  
78 stringent E-value threshold allowed very small genes and fragments to be classified as well.

## 79 **Carbohydrate-active enzymes**

80 Carbohydrate-active enzymes (Lombard *et al.*, 2014, [www.cazy.org](http://www.cazy.org)) in the MAGs were identified  
81 and classified with dbCAN 4.0 (Yin *et al.*, 2012). For comparison, genomes belonging to the  
82 *Acidobacteria* and to genera with DsrAB-encoding members were downloaded from NCBI (June  
83 2017) and analyzed with dbCAN as well. Genera with DsrAB-encoding members were identified  
84 based on literature research and UniProt InterPro/TIGRFAM searches for DsrA  
85 (IPR011806/TIGR02064) and DsrB (IPR011808/TIGR02066). For comparability and consistency,  
86 *de novo* ORF predictions were performed with prodigal (Hyatt *et al.*, 2010) for all genomes and  
87 MAGs. Presence of DsrA and/or DsrB was again verified with the TIGRFAM models and HMMER.  
88 dbCAN's HMM profiles were identified with HMMER and parsed with the provided dbCAN script  
89 and R (R Core Team, 2017). Analysed acidobacterial genomes belonged to the genera  
90 *Acidobacterium*, *Bryobacter*, *Chloracidobacterium*, *Edaphobacter*, *Geothrix*, *Granulicella*,  
91 *Holophaga*, *Koribacter*, *Luteitalea*, *Pyrinomonas*, *Silvibacterium*, *Solibacter*, *Terracidiphilus*,  
92 *Terriglobus*, and *Thermoanaerobaculum*. 82 additional acidobacterial genomes without genus  
93 classification were also analysed. DsrA/DsrB-encoding genomes derived from the genera  
94 *Acetonema*, *Achromatium*, *Acidiferrobacter*, *Alkalilimnicola*, *Allochromatium*, *Ammonifex*,  
95 *Anaeromyxobacter*, *Archaeoglobus*, *Azospirillum*, *Bilophila*, *Caldimicrobium*, *Caldivirga*,  
96 *Carboxydotherrmus*, *Chlorobaculum*, *Chlorobium*, *Curvibacter*, *Desulfacinum*, *Desulfamplus*,  
97 *Desulfarculus*, *Desulfatibacillum*, *Desulfatiglans*, *Desulfatirhabdium*, *Desulfatitalea*,  
98 *Desulfitibacter*, *Desulfitobacterium*, *Desulfobacca*, *Desulfobacter*, *Desulfobacterium*,  
99 *Desulfobacula*, *Desulfobulbus*, *Desulfocapsa*, *Desulfocarbo*, *Desulfococcus*, *Desulfocurvus*,  
100 *Desulfofervidus*, *Desulfofustis*, *Desulfohalobium*, *Desulfoluna*, *Desulfomicrobium*, *Desulfomonile*,  
101 *Desulfonatronospira*, *Desulfonatronovibrio*, *Desulfonatronum*, *Desulfonauticus*, *Desulfonispora*,  
102 *Desulfopertinax*, *Desulfopila*, *Desulfoplanes*, *Desulforegula*, *Desulforhopalus*, *Desulforudis*,  
103 *Desulfosarcina*, *Desulfospira*, *Desulfosporosinus*, *Desulfotalea*, *Desulfothermus*, *Desulfotignum*,  
104 *Desulfotomaculum*, *Desulfovermiculus*, *Desulfovibrio*, *Desulfovirgula*, *Desulfurella*,

105 *Desulfurispora, Desulfurivibrio, Dethiosulfatarculus, Dissulfuribacter, Ferriphaselus, Gallionella,*  
106 *Gemmatimonas, Gordonibacter, Gracilibacter, Halodesulfovibrio, Halorhodospira, Lamprocystis,*  
107 *Lautropia, Magnetococcus, Magnetomorum, Magnetoovum, Magnetospira, Magnetospirillum,*  
108 *Magnetovibrio, Marichromatium, Moorella, Pelodictyon, Phaeospirillum, Prosthecochloris,*  
109 *Pyrobaculum, Rhodomicrobium, Rubrivivax, Ruegeria, Ruthia, Sedimenticola, Sideroxydans,*  
110 *Sulfuricella, Sulfuritalea, Syntrophobacter, Syntrophomonas, Syntrophus, Thermanaeromonas,*  
111 *Thermocladium, Thermodesulfatator, Thermodesulfobacterium, Thermodesulfobium,*  
112 *Thermodesulforhabdus, Thermodesulfovibrio, Thermoproteus, Thermosinus,*  
113 *Thermosulfurimonas, Thioalkalivibrio, Thiobacillus, Thiocapsa, Thiocystis, Thiodiazotropha,*  
114 *Thioflaviccoccus, Thioflexothrix, Thioglobus, Thiohalocapsa, Thiohalomonas, Thiolapillus,*  
115 *Thiomargarita, Thioploca, Thiorhodococcus, Thiorhodovibrio, Thiosymbion, Thiothrix, and*  
116 *Vulcanisaeta.*

## 117 **Expression analysis**

118 Metatranscriptomic reads were quality filtered at the JGI using their analysis pipeline. In short,  
119 the raw reads were quality-trimmed to Q10, adapter-trimmed using bbdduk (minimal allowed  
120 length 50 nt), followed by removal of PhiX control sequences, artefacts, human sequences, and  
121 reads containing N bases with bbdduk/bbmap (BBTools, [http://jgi.doe.gov/data-and-](http://jgi.doe.gov/data-and-tools/bbtools/)  
122 [tools/bbtools/](http://jgi.doe.gov/data-and-tools/bbtools/)). rRNA reads were removed using the SILVA database (Quast *et al.*, 2013) and  
123 bbmap. This resulted in 73 samples with 22–161 million high quality non-rRNA reads with a  
124 median length of 150 nt. Those were then mapped to the combined metagenomic assembly  
125 using bowtie2 with the default scoring function (Langmead and Salzberg, 2012). Fragments per  
126 CDS were then independently counted using featureCounts 1.5.0 (Liao *et al.*, 2014). Differential  
127 expression analysis of SbA1–7 was performed using R (R Core Team, 2017) and the DESeq2  
128 package (Love *et al.*, 2014).

## 129 **Supplementary Results and Discussion**

### 130 **Sulfite dehydrogenase homologs**

131 We identified several genes encoding putative sulfite dehydrogenases of the COG2041 family:  
132 (A) SbA3 and SbA4 encode orthologs to *Cupriavidus necator* (*Ralstonia eutropha*) N-1 *soxC*  
133 (CNE\_1c35220), Sbm\_v1\_d1920025 and Sbm\_v1\_e3730002, respectively (~50% sequence  
134 identity). Directly downstream are genes homologous to the N-terminal region of *C. necator*  
135 *soxD* (CNE\_1c35210), Sbm\_v1\_d1920026 and Sbm\_v1\_e3730003, respectively (~40% sequence  
136 identity at <50% overlap). *soxABXYZ*, present in *C. necator*, are not found on any acidobacterial  
137 MAG. However, *C. necator* N-1 can not oxidize thiosulfate (Dahl and Friedrich, 2008). (B) *Ca.*  
138 *Solibacter usitatus* encodes a *sorAB*-like gene pair (Acid\_7248–7249), which we also found in  
139 SbA1 (Sbm\_v1\_b530003–4), SbA3 (Sbm\_v1\_d50016–17), SbA4 (Sbm\_v1\_e5130014–13 and

140 fragmented Sbm\_v1\_e7680001-2), and SbA6 (Sbm\_v1\_g110054-55). The *sorAB*-like genes from  
141 the MAGs are <40% identical to *Starkeya novella* SorAB (Snov\_3268-3269). SorA transfers  
142 electrons from oxidizing sulfite to the membrane-bound cytochrome c SorB subunit. SorB is then  
143 oxidized by a terminal oxidase. SorAB in *S. novella* is potentially involved in aerobic respiration  
144 or in sulfite detoxification (Simon and Kroneck, 2013). (C) YedYZ-like proteins are present in  
145 SbA1 (Sbm\_v1\_b880028-29), SbA4 (Sbm\_v1\_e240001-2, fragmented), and SbA5  
146 (Sbm\_v1\_f120015-16), which are related to the sulfide oxidase family and are part of COG2041.  
147 Their function is unknown (Dahl and Friedrich, 2008) and they are found in several other  
148 acidobacterial genomes and *E. coli*. (D) Additional, completely uncharacterized members of  
149 COG2041 are present in SbA3, SbA4, and SbA5.

## 150 **Respiration and oxidative stress**

151 Respiration with oxygen as terminal electron acceptor requires a membrane electron transport  
152 chain involving up to four complexes, i.e., the NADH dehydrogenase (NDH, respiratory complex  
153 I), the succinate dehydrogenase (SDH, respiratory complex II), the quinol—cytochrome-c  
154 reductase (cytochrome *bc<sub>1</sub>* complex or alternative complex III, respiratory complex III), and the  
155 terminal oxidase (cytochrome-c oxidase or cytochrome *bd*-type oxidase, respiratory complex  
156 IV). Complexes I (NDH-1 only), III, and IV (except *bd*-type) translocate protons through the cell  
157 membrane building up proton motive force. The ATP synthase uses the proton motive force to  
158 generate ATP and is called respiratory complex V. SbA5 and SbA7 encode every gene for  
159 complexes I-V, while SbA1, SbA3, SbA4, and SbA6 encode only partial operons for some  
160 complexes. SbA2, the most incomplete MAG, is lacking all genes of complex II and V (Figure 3).

161 Oxidation of organic matter generates reducing equivalents, e.g., in glycolysis one NADH is  
162 formed per one glucose. NADH is oxidized to NAD<sup>+</sup>/H<sup>+</sup> by the NDH, which in turn transfers  
163 electron to the membrane quinone pool. Two types of NDH are characterized in *E. coli*. NDH-1,  
164 consisting of a large complex encoded by the *nuo* operon, translocates protons, while NDH-2,  
165 encoded by a single gene (*ndh*), does not. We identified both NDH-1 and NDH-2 in the MAGs,  
166 with the latter (partially) missing in SbA2, SbA4, and SbA7. All MAGs harbour one or more  
167 (partially fragmented) *nuoACDHJKLMN* operons. One operon in each MAG also includes *nuoEFG*  
168 (except in SbA3). NuoEFG forms the catalytic NADH dehydrogenase module of complex I, while  
169 NuoBCDHIN and NuoKLM form the hydrogenase and transporter modules, respectively. NuoA  
170 and NuoJ are not part of the modules and likely involved in assembly of the complex (Friedrich  
171 *et al.*, 2016). SbA6 is missing *nuoI*, likely because of MAG incompleteness (Supplementary Table  
172 S2b).

173 SDH is encoded by the *sdh* operon. It consists of a cytoplasmic-facing catalytic subunit (SdhAB)  
174 and a transmembrane cytochrome *b<sub>556</sub>* or *b<sub>558</sub>* subunit (SdhCD in *E. coli* or larger SdhC in *B.*  
175 *subtilis*), which together transfer the electrons from oxidation of succinate to fumarate into the

176 membrane quinone pool. It is the only complex of the respiration chain not involved in proton  
177 translocation. Both complex I and II are found in many anaerobically respiring microorganisms,  
178 including SRM (e.g., Pereira *et al.*, 2011; Klenk *et al.*, 1997; Rabus *et al.*, 2004; Strittmatter *et*  
179 *al.*, 2009; Plugge *et al.*, 2012; Visser *et al.*, 2013; Kuever *et al.*, 2014; Mardanov *et al.*, 2016). We  
180 identified SDH in all MAGs but SbA2, arranged like the *B. subtilis*-type operon (*sdhCAB*)  
181 (Supplementary Table S2c). SbA1 harbours a second operon (*sdhACDB*) that could also be a  
182 fumarate reductase (*frdACDB*). Fumarate reductase performs the reverse reaction of SDH as  
183 part of the reductive citric acid cycle, but both enzymes were shown to catalyze both reaction in  
184 *E. coli* (Guest, 1981; Maklashina *et al.*, 1998). No other MAG harboured candidates for fumarate  
185 reductase.

186 Complex III, the quinol—cytochrome-c reductase transfers electron from the membrane quinone  
187 pool to cytochrome c. Cytochrome c is then oxidized and O<sub>2</sub> is reduced to H<sub>2</sub>O by a cytochrome-  
188 c terminal oxidase. Alternately, a quinol terminal oxidase can directly utilize electrons from the  
189 membrane quinone pool to reduce O<sub>2</sub>. Two isofunctional complexes of quinol—cytochrome-c  
190 reductases are known. The two component cytochrome *bc<sub>1</sub>* complex is encoded by the *pet*  
191 operon and present in all MAGs but SbA2 (Supplementary Table S2d). Alternative complex III  
192 (ACIII) (Refojo *et al.*, 2012) with seven subunits is encoded by the *act* operon and present in all  
193 MAGs but SbA7 (Supplementary Table S2e). Some of the terminal oxidase genes are found  
194 immediately down- or upstream of quinol—cytochrome-c reductase operons (Supplementary  
195 Tables S2e-g), as is observed in other *Acidobacteria* (e.g., *Ca. K. versatilis*, *Ca. S. usitatus*,  
196 *Chloracidobacterium thermophilum*; Garcia Costas *et al.*, 2012). In between alternative complex  
197 III and the terminal oxidase genes, we always find the *sco* gene coding for a chaperone of the  
198 SCO1/SenC family, a putative assembly factor for respiratory complexes (Buggy and Bauer,  
199 1995). We identified both families of terminal oxidases, i.e., haem-copper oxidases (HCO) of  
200 classes A and C, which are cytochrome-c oxidases, and cytochrome *bd*-type oxidases, which are  
201 quinol oxidases. HCO class A are classified as low-affinity terminal oxidases (LATO) in contrast to  
202 HCO class C and *bd*-type oxidases that are high-affinity terminal oxidases (HATO) (Morris and  
203 Schmidt, 2013). Three distinct operon structures for HCO family A were observed in SbA1–7 and  
204 also other *Acidobacteria*, e.g. *Ca. K. versatilis* and *Ca. S. usitatus*: (1) downstream of ACIII and  
205 *sco*, (2) upstream of *petBC* (not found in *Ca. K. versatilis*), both named *ctaCDEF*, and (3) without  
206 quinol—cytochrome-c reductase genes found up- or downstream but with a subunit III consisting  
207 of two genes (*coxOP*) (Supplementary Table S2f). The subunit II of all three types have the Cu<sub>4</sub>  
208 copper center motifs (IPR001505), which is found in cytochrome-c oxidases but not in quinol  
209 oxidases (Pereira *et al.*, 2001). The essential subunits are I and II (Pereira *et al.*, 2001) and are  
210 present in all MAGs but SbA4. High-affinity terminal oxidases of HCO class C or *bd*-type oxidases  
211 are present in SbA1, SbA5, SbA3, and SbA6 (Supplementary Table S2g). Both types are encoded  
212 by two subunits on the MAGs. Secondary genes, as found in other organisms, e.g., *ccoQP*  
213 (Bühler *et al.*, 2010) or *cydS/cydX* (Cook and Poole, 2016), are missing.

214 An ATP synthase of the F<sub>o</sub>F<sub>1</sub>-ATPase type is present in all MAGs but SbA2 (Supplementary Table  
215 S2h). Its genes are consistently split into two operons, *atpZIBE* and *atpF'FHAGDC*. The former is  
216 missing in SbA6, while the later is fragmented in SbA1 with *atpG* missing completely. *atpF* and  
217 *atpF'* are paralogs of the subunit B. In cyanobacteria, a homodimer of subunit B is replaced by a  
218 heterodimer of subunit B and B' (Dunn *et al.*, 2001). However, *atpF'F* is found in  
219 nonphotosynthetic *Acidobacteria*, e.g., *Ca. K. versatilis* and *Ca. S. usitatus*, and also in the  
220 photoheterotroph *Chloracidobacterium thermophilum*.

221 A second function is attributed to terminal oxidases in some organisms, i.e., defence against  
222 oxidative stress, especially to *bd*-type oxidases (Giuffrè *et al.*, 2014). The strictly anaerobic SRM  
223 *Desulfovibrio vulgaris* encodes two terminal oxidases, one cytochrome-c oxidase (HCO class A,  
224 DVU\_1815–1812) and one *bd*-type oxidase (DVU\_3271–3270). It was demonstrated that both are  
225 involved in the detoxification of oxygen (Ramel *et al.*, 2013). Terminal oxidases are also needed  
226 to remove oxygen produced by superoxide detoxification. Superoxide dismutase converts  
227 superoxide to oxygen and hydrogen peroxide. Hydrogen peroxide is then removed by catalases,  
228 peroxidases, or glutathione peroxidases (Figure 3). Manganese-dependent superoxide dismutase  
229 (*sodA*) is found in all MAGs and Cu-Zn-dependent superoxide dismutase (*sodC*) in SbA2 and  
230 SbA7. SbA1, SbA2, SbA3, and SbA5 encode for bifunctional haem-dependent catalase-  
231 peroxidases (*katG*), but none of the seven MAGs for mono-functional, haem-dependent  
232 catalases (*katE/katA*) or manganese-dependent catalases (*katN*). SbA2 and SbA4 encode for  
233 glutathione peroxidases (Supplementary Table S2i).

## 234 **Dissimilatory nitrogen metabolism and nitrogen fixation**

235 Although nitrate availability is limited in wetlands (Pester *et al.*, 2012a), we investigated the  
236 possibility for nitrate respiration in the MAGs. SRM contribute to nitrogen cycling, as some can  
237 respire nitrate/nitrite as an alternative electron acceptor to sulfate or fix atmospheric nitrogen  
238 using nitrogenase (Rabus *et al.*, 2013; Marietou, 2016). Oxidation of sulfur compounds coupled  
239 to nitrate or nitrite reduction is common among sulfide-/thiosulfate-oxidizing microorganisms  
240 (Ghosh and Dam, 2009), but was also observed in organisms encoding reductive-type DsrAB  
241 genes. *Desulfovibrio desulfuricans*, *Desulfobulbus propionicus*, and *Desulfurivibrio alkaliphilus*  
242 were shown to oxidize sulfide with nitrate/nitrite as the electron acceptor (Dannenberg *et al.*,  
243 1992; Thorup *et al.*, 2017). It is also proposed that the sulfide-oxidizing cable bacteria  
244 (*Desulfobulbaceae*) can use nitrate/nitrate as an alternative to oxygen (Marzocchi *et al.*, 2014).

245 Only few *Acidobacteria* were shown to perform nitrate reduction or encode the required marker  
246 genes (e.g., Ward *et al.*, 2009; Männistö *et al.*, 2012). SbA1–7 lack *narGHI*, *napAB*, *nrfA*, *nirK*,  
247 *nirS*, *norBC*, and *nosZ* (Kraft *et al.*, 2011) and thus the genomic potential for dissimilatory nitrate  
248 or nitrite reduction. Only SbA5 harbours two gene copies of the nitric oxide reductase NorZ (also  
249 known as qNOR), an enzyme that is likely not involved in denitrification but used for nitric oxide

250 detoxification (Kraft *et al.*, 2011). The MAGs also lacked key genes of aerobic nitrogen  
251 metabolisms i.e., *amoCAB* (ammonia oxidation), *nxrAB* (nitrite oxidation), and *nifH* (nitrogen  
252 fixation) (Pester *et al.*, 2012b, 2014; Gaby and Buckley, 2014; Daims *et al.*, 2016).

### 253 **Dissimilatory metal reduction**

254 The genes required for dissimilatory metal reduction (*mtr/omc* operon) as described for  
255 *Shewanella* and *Geobacter* (Shi *et al.*, 2006; Weber *et al.*, 2006; Coursolle and Gralnick, 2010)  
256 are absent in all MAGs. Direct interspecies electron transfer (DIET) is an important but  
257 understudied process in wetlands (Holmes *et al.*, 2017). However, we could not identify any  
258 homologs to the essential pilin-associated c-type cytochrome OmcS (Shrestha *et al.*, 2013;  
259 Holmes *et al.*, 2017). We found an ortholog to a novel metal reduction complex in  
260 *Desulfotomaculum reducens* (Dred\_1685-1686) (Otwell *et al.*, 2015) in SbA2 (Sbm\_v1\_c100009-  
261 10). This complex was shown to reduce Fe(III), Cr(VI), and U(VI) with NADH as the electron  
262 donor, but its physiological role is unresolved (Otwell *et al.*, 2015).

### 263 **Import and phosphorylation of glucose**

264 All genomes except SbA7 harbour at least one cytoplasmic glucokinase (*glk/glcK*)  
265 (Supplementary Table S2m). Cytoplasmic glucokinases are required to utilize glucose released  
266 by cytoplasmic polysaccharides degradation, but are not required for growth on glucose, as  
267 extracellular glucose can be imported and phosphorylated by the phosphotransferase system  
268 (PTS). The PTS is missing in all MAGs — Enzyme I and histidine protein are both not present.  
269 Only one fragment of a mannitol-specific enzyme IIBC component is found in SbA2  
270 (Sbm\_v1\_c130007). Alternately, Lindner *et al.* (2011) demonstrated that inositol permeases  
271 *IoIT1/IoIT2* are low-affinity glucose permeases, and together with glucokinases can replace the  
272 PTS in *Corynebacterium glutamicum*. *ioIT1* and *ioIT2* match TIGRFAM's sugar porter motif  
273 TIGR00879, which we also find in genes in all genomes but SbA2 (data not shown). These could  
274 putatively transport glucose, but also other sugars or inositol.

### 275 **N-acetylgalactosamine degradation**

276 *N*-acetylgalactosamine (GalNAc) degradation consists of five steps before entering glycolysis:  
277 (1) *N*-acetylgalactosamine kinase, (2) *N*-acetylgalactosamine-6-phosphate deacetylase, (3)  
278 galactosamine-6-phosphate deaminase, (4) tagatose-6-phosphate kinase, and (5) tagatose-  
279 bisphosphate aldolase (Figure 3, Supplementary Table S2I). Neither GalNAc-specific PTS genes  
280 or *N*-acetylgalactosamine kinase (*agaK*) were identified. However, other sugar kinases are  
281 present, e.g., *glcK*-type glucokinases. Not all sugar kinases are specific for only one substrate  
282 (e.g., Reith *et al.*, 2011), therefore some of the those could putatively act as *N*-  
283 acetylgalactosamine kinases. *N*-acetylglucosamine-6-phosphate deacetylase (*nagA*) was found  
284 in six MAGs. *E. coli* possesses two homologous *N*-acetylglucosamine-6-phosphate deacetylases



285 (*nagA* and *agaA*, COG1820), both of whom can utilize GalNAc and *N*-acetylglucosamine (GlcNAc)  
286 (Hu *et al.*, 2013). Thereby it is likely the identified genes code for bifunctional deacetylases as  
287 well. Galactosamine-6-phosphate deaminase (*AgaS*), found in SbA1, SbA7, and SbA6, converts  
288 D-galactosamine 6-phosphate to D-tagatofuranose 6-phosphate. PfkB, found in SbA3, SbA4, and  
289 SbA2 is a bifunctional 6-phosphofructokinase and tagatose-6-phosphate kinase in *E. coli* (Babul,  
290 1978). Most MAGs contain the last enzyme needed, tagatose-bisphosphate aldolase (*LacD*),  
291 which is a class I aldolase that produces glycerone phosphate and D-glyceraldehyde 3-  
292 phosphate. The *E. coli* class II aldolases of the same function (*kbaYZ*, *gatYZ*) are heteromeric.  
293 Only the noncatalytic subunit *kbaZ* is found in SbA1 (Sbm\_v1\_b1710004). *kbaY* was never  
294 found.

### 295 **Lactate, propionate, and butyrate metabolism**

296 Six of the acidobacterial MAGs harbour four different types of L-lactate dehydrogenases, while  
297 SbA6 has none (Supplementary Table S2o). NAD-dependent L-lactate dehydrogenase Ldh (SbA7  
298 and SbA5) ferments pyruvate to L-lactate anaerobically, while the FMN-dependent L-lactate  
299 dehydrogenase LldD (SbA1, SbA7, SbA3, and SbA4), L-lactate/D-lactate/glycolate  
300 dehydrogenase GlcDEF (SbA5, SbA3, and SbA4) and, LUD-type L-lactate dehydrogenase LutABC  
301 (SbA5, SbA2, SbA3, and SbA4) utilize L-lactate as an energy and carbon source. We found  
302 putative D-lactate dehydrogenases (Dld) (SbA1, SbA5, and SbA2), which probably convert D-  
303 lactate to pyruvate. These are homologs to *Archaeoglobus fulgidus* Dld (AF\_0394) and  
304 mitochondrial D-lactate dehydrogenases (<30% identity).

305 With the exception of SbA2, all MAGs contain key genes for propionate oxidation with complete  
306 pathways found in SbA1 and SbA5 (Supplementary Table S2o). Conversion of propionate to  
307 propionyl-CoA is performed by a CoA transferase. Propionyl-CoA:succinate CoA transferase ScpC  
308 is encoded in SbA1 and acetate CoA-transferase YdiF, a family 1 CoA transferase, which has  
309 propionyl-CoA:acetate CoA transferase activity (Rangarajan *et al.*, 2005), is encoded in SbA5  
310 and SbA4 (Supplementary Table S2o). Other family 1 CoA transferase genes (IPR004165) are  
311 present, except in SbA2. It is unclear if these can utilize propionate as well, however it was  
312 proposed before for *Desulfotomaculum kuznetsovii* (Visser *et al.*, 2013). The main subunit gene  
313 of the propionyl-CoA carboxylase (*PccB*), which produces (*S*)-methylmalonyl-CoA, is present in  
314 all six MAGs. The propionyl-CoA carboxylase biotin carboxylase subunit and biotin carboxyl  
315 carrier protein are, however, missing in SbA7 and SbA4. Stereochemical inversion to (*R*)-  
316 methylmalonyl-CoA is performed by methylmalonyl-CoA epimerase (*Mce*), which is encoded in  
317 the same MAGs as ScpC/YdiF. Methylmalonyl-CoA mutase, catalyzing the final step in the  
318 pathway, is present in all six MAGs (Supplementary Table S2o).

319 Various putative beta-oxidation genes are present in all MAGs, however the substrate  
320 specificities of their encoded enzymes are unclear. For the case of butyrate oxidation, the

321 physiological mechanisms are resolved in detail in the syntrophic organism *Syntrophomonas*  
322 *wolfei* (Schmidt *et al.*, 2013). No orthologs to the key enzyme butyryl-CoA dehydrogenase  
323 (Swol\_1933/Swol\_2052) are present in any of the MAGs, therefore it is unlikely they can perform  
324 (syntrophic) butyrate oxidation.

### 325 **Differential gene expression between anoxic microcosm incubations**

326 To analyze changes in gene expression of SbA1–7 during the anoxic peat soil incubations, we  
327 performed pairwise comparisons between different treatments and time points: (1) at every  
328 time point and for each added substrate we compared the microcosms amended with sulfate to  
329 those without external sulfate (i.e., stimulation or downregulation caused by sulfate), (2) at  
330 every time point and separately for sulfate-stimulated incubations and no-sulfate-controls we  
331 compared microcosms amended with substrate to the no-substrate-controls (i.e., up- or  
332 downregulation caused by formate, acetate, propionate, lactate, or butyrate); and (3) for each  
333 treatment we compared the early time point (8 days) to the late time point (36 days)  
334 (Supplementary Table S3a). When compared to the gene expression changes between the  
335 native soil and the incubations, less genes were upregulated between different incubations  
336 treatments. Differentially expressed genes included dissimilatory sulfur genes, hydrogen  
337 metabolism genes, electron transfer genes, and a few genes belonging to the tricarboxylic acid  
338 cycle (Supplementary Table S3a).

339 Compared to the butyrate-only incubation, expression of *sat*, *aprBA*, *qmoBC*, *dsrAB*, *dsrN*, *dsrT*,  
340 and *dsrL* of SbA2 was induced upon addition of sulfate and butyrate. One subunit of (2R)-  
341 sulfolactate sulfo-lyase (*suyB*) was overexpressed in SbA4 in incubations with sulfate and  
342 formate. Compared to the no-substrate-controls, we observed significant overexpression of  
343 some sulfur metabolism genes from SbA2, SbA3, and SbA7 in formate-, propionate-, lactate-,  
344 and/or butyrate-amended incubations, with and/or without supplemental sulfate  
345 (Supplementary Table S3a). However, we observed no significant expression changes in the  
346 genes that are possibly involved in oxidation of the amended substrates. Moderate expression  
347 of sulfate reduction genes without addition of external sulfate is expected due to cryptic sulfur  
348 cycling under anoxic conditions (Pester *et al.*, 2012a). The peat soil microcosms without external  
349 sulfate contained low amounts of endogenous sulfate ( $24 \pm 6 \mu\text{M}$ ) that was only depleted after  
350 11–25 days of incubation (Hausmann *et al.*, 2016).

351 Group 3 hydrogenase gene were affected by substrate amendment in incubation with and/or  
352 without external sulfate added. Group 3b hydrogenase (*hyhBCSL*) of SbA2 was stimulated by all  
353 substrates except acetate. Group 3c hydrogenase (*mvhDCA*) of SbA4 was significantly  
354 downregulated after the addition of propionate, lactate, and butyrate. Group 3d hydrogenase  
355 (*hoxEFYH*) of SbA1 was significantly overexpressed in butyrate-amended microcosms. HoxF of  
356 SbA2 was overexpressed when lactate or butyrate was added. Group 3 hydrogenases are

357 cytoplasmic and possibly bidirectional (Greening *et al.*, 2016), leaving it unresolved if hydrogen  
358 is produced from the substrates or if hydrogen is provided from a substrate-utilizing syntrophic  
359 partner.

## 360 **Supplementary References**

- 361 Babul J. (1978). Phosphofructokinases from *Escherichia coli*: purification and characterization of  
362 the nonallosteric isozyme. *J Biol Chem* **253**: 4350–4355.
- 363 Buggy J, Bauer CE. (1995). Cloning and characterization of *senC*, a gene involved in both aerobic  
364 respiration and photosynthesis gene expression in *Rhodobacter capsulatus*. *J Bacteriol* **177**:  
365 6958–6965.
- 366 Bühler D, Rossmann R, Landolt S, Balsiger S, Fischer H-M, Hennecke H. (2010). Disparate  
367 pathways for the biogenesis of cytochrome oxidases in *Bradyrhizobium japonicum*. *J Biol Chem*  
368 **285**: 15704–15713.
- 369 Cole JR, Wang Q, Fish JA, Chai B, McGarrell DM, Sun Y *et al.* (2014). Ribosomal Database Project:  
370 data and tools for high throughput rRNA analysis. *Nucleic Acids Res* **42**: D633–D642.
- 371 Cook GM, Poole RK. (2016). A bacterial oxidase like no other? *Science* **352**: 518–519.
- 372 Coursolle D, Gralnick JA. (2010). Modularity of the Mtr respiratory pathway of *Shewanella*  
373 *oneidensis* strain MR-1. *Mol Microbiol* **77**: 995–1008.
- 374 Dahl C, Friedrich CG. (2008). Microbial Sulfur Metabolism. Springer, Berlin Heidelberg.
- 375 Daims H, Lücker S, Wagner M. (2016). A new perspective on microbes formerly known as nitrite-  
376 oxidizing bacteria. *Trends Microbiol* **24**: 699–712.
- 377 Dannenberg S, Kroder M, Dilling W, Cypionka H. (1992). Oxidation of H<sub>2</sub>, organic compounds and  
378 inorganic sulfur compounds coupled to reduction of O<sub>2</sub> or nitrate by sulfate-reducing bacteria.  
379 *Arch Microbiol* **158**: 93–99.
- 380 Dibrova DV, Galperin MY, Mulkidjanian AY. (2010). Characterization of the N-ATPase, a distinct,  
381 laterally transferred Na<sup>+</sup>-translocating form of the bacterial F-type membrane ATPase.  
382 *Bioinformatics* **26**: 1473–1476.
- 383 Dunn SD, Kellner E, Lill H. (2001). Specific heterodimer formation by the cytoplasmic domains of  
384 the *b* and *b'* subunits of cyanobacterial ATP synthase. *Biochemistry* **40**: 187–192.
- 385 Eisen JA, Nelson KE, Paulsen IT, Heidelberg JF, Wu M, Dodson RJ *et al.* (2002). The complete

- 386 genome sequence of *Chlorobium tepidum* TLS, a photosynthetic, anaerobic, green-sulfur  
387 bacterium. *Proc Natl Acad Sci USA* **99**: 9509–9514.
- 388 Friedrich T, Dekovic DK, Burschel S. (2016). Assembly of the *Escherichia coli* NADH:ubiquinone  
389 oxidoreductase (respiratory complex I). *Biochim Biophys Acta* **1857**: 214–223.
- 390 Gaby JC, Buckley DH. (2014). A comprehensive aligned *nifH* gene database: a multipurpose tool  
391 for studies of nitrogen-fixing bacteria. *Database (Oxford)* **2014**: bau001.
- 392 Garcia Costas AM, Liu Z, Tomsho LP, Schuster SC, Ward DM, Bryant DA. (2012). Complete  
393 genome of *Candidatus Chloracidobacterium thermophilum*, a chlorophyll-based  
394 photoheterotroph belonging to the phylum *Acidobacteria*. *Environ Microbiol* **14**: 177–190.
- 395 Ghosh W, Dam B. (2009). Biochemistry and molecular biology of lithotrophic sulfur oxidation by  
396 taxonomically and ecologically diverse bacteria and archaea. *FEMS Microbiol Rev* **33**: 999–1043.
- 397 Giuffrè A, Borisov VB, Arese M, Sarti P, Forte E. (2014). Cytochrome *bd* oxidase and bacterial  
398 tolerance to oxidative and nitrosative stress. *Biochim Biophys Acta* **1837**: 1178–1187.
- 399 Greening C, Biswas A, Carere CR, Jackson CJ, Taylor MC, Stott MB *et al.* (2016). Genomic and  
400 metagenomic surveys of hydrogenase distribution indicate H<sub>2</sub> is a widely utilised energy source  
401 for microbial growth and survival. *ISME J* **10**: 761–777.
- 402 Guest JR. (1981). Partial replacement of succinate dehydrogenase function by phage- and  
403 plasmid-specified fumarate reductase in *Escherichia coli*. *J Gen Microbiol* **122**: 171–179.
- 404 Hausmann B, Knorr K-H, Schreck K, Tringe SG, Glavina del Rio T, Loy A *et al.* (2016). Consortia of  
405 low-abundance bacteria drive sulfate reduction-dependent degradation of fermentation  
406 products in peat soil microcosms. *The ISME Journal* **10**: 2365–2375.
- 407 Holmes DE, Shrestha PM, Walker DJF, Dang Y, Nevin KP, Woodard TL *et al.* (2017).  
408 Metatranscriptomic evidence for direct interspecies electron transfer between *Geobacter* and  
409 *Methanotherix* species in methanogenic rice paddy soils. *Appl Environ Microbiol* **83**: e00223–17.
- 410 Hu Z, Patel IR, Mukherjee A. (2013). Genetic analysis of the roles of *agaA*, *agal*, and *agaS* genes  
411 in the N-acetyl-D-galactosamine and D-galactosamine catabolic pathways in *Escherichia coli*  
412 strains O157:H7 and C. *BMC Microbiol* **13**: 94.
- 413 Huang CJ, Barrett EL. (1991). Sequence analysis and expression of the *Salmonella typhimurium*  
414 *asr* operon encoding production of hydrogen sulfide from sulfite. *J Bacteriol* **173**: 1544–1553.
- 415 Huerta-Cepas J, Szklarczyk D, Forslund K, Cook H, Heller D, Walter MC *et al.* (2016). eggNOG 4.5:

- 416 a hierarchical orthology framework with improved functional annotations for eukaryotic,  
417 prokaryotic and viral sequences. *Nucleic Acids Res* **44**: D286–D293.
- 418 Hyatt D, Chen G-L, Locascio PF, Land ML, Larimer FW, Hauser LJ. (2010). Prodigal: prokaryotic  
419 gene recognition and translation initiation site identification. *BMC Bioinformatics* **11**: 119.
- 420 Iguchi H, Yurimoto H, Sakai Y. (2010). Soluble and particulate methane monooxygenase gene  
421 clusters of the type I methanotroph *Methylovulum miyakonense* HT12. *FEMS Microbiol Lett* **312**:  
422 71–76.
- 423 Johnson EF, Mukhopadhyay B. (2005). A new type of sulfite reductase, a novel coenzyme F<sub>420</sub>-  
424 dependent enzyme, from the methanarchaeon *Methanocaldococcus jannaschii*. *J Biol Chem*  
425 **280**: 38776–38786.
- 426 Jones P, Binns D, Chang H-Y, Fraser M, Li W, McAnulla C *et al.* (2014). InterProScan 5: genome-  
427 scale protein function classification. *Bioinformatics* **30**: 1236–1240.
- 428 Katoh K, Standley DM. (2013). MAFFT multiple sequence alignment software version 7:  
429 improvements in performance and usability. *Mol Biol Evol* **30**: 772–780.
- 430 Klenk HP, Clayton RA, Tomb JF, White O, Nelson KE, Ketchum KA *et al.* (1997). The complete  
431 genome sequence of the hyperthermophilic, sulphate-reducing archaeon *Archaeoglobus*  
432 *fulgidus*. *Nature* **390**: 364–370.
- 433 Kraft B, Strous M, Tegetmeyer HE. (2011). Microbial nitrate respiration–genes, enzymes and  
434 environmental distribution. *J Biotechnol* **155**: 104–117.
- 435 Krogh A, Larsson B, von Heijne G, Sonnhammer ELL. (2001). Predicting transmembrane protein  
436 topology with a hidden Markov model: application to complete genomes. *J Mol Biol* **305**: 567–  
437 580.
- 438 Kuever J, Visser M, Loeffler C, Boll M, Worm P, Sousa DZ *et al.* (2014). Genome analysis of  
439 *Desulfotomaculum gibsoniae* strain Groll<sup>T</sup> a highly versatile Gram-positive sulfate-reducing  
440 bacterium. *Stand Genomic Sci* **9**: 821–839.
- 441 Langmead B, Salzberg SL. (2012). Fast gapped-read alignment with Bowtie 2. *Nat Methods* **9**:  
442 357–359.
- 443 Lartillot N, Lepage T, Blanquart S. (2009). PhyloBayes 3: a Bayesian software package for  
444 phylogenetic reconstruction and molecular dating. *Bioinformatics* **25**: 2286–2288.
- 445 Laska S, Lottspeich F, Kletzin A. (2003). Membrane-bound hydrogenase and sulfur reductase of

- 446 the hyperthermophilic and acidophilic archaeon *Acidianus ambivalens*. *Microbiology* **149**: 2357-  
447 2371.
- 448 Letunic I, Bork P. (2016). Interactive tree of life (iTOL) v3: an online tool for the display and  
449 annotation of phylogenetic and other trees. *Nucleic Acids Res* **44**: W242-W245.
- 450 Liao Y, Smyth GK, Shi W. (2014). featureCounts: an efficient general purpose program for  
451 assigning sequence reads to genomic features. *Bioinformatics* **30**: 923-930.
- 452 Lindner SN, Seibold GM, Henrich A, Krämer R, Wendisch VF. (2011). Phosphotransferase system-  
453 independent glucose utilization in *Corynebacterium glutamicum* by inositol permeases and  
454 glucokinases. *Appl Environ Microbiol* **77**: 3571-3581.
- 455 Lombard V, Golaconda Ramulu H, Drula E, Coutinho PM, Henrissat B. (2014). The carbohydrate-  
456 active enzymes database (CAZy) in 2013. *Nucleic Acids Res* **42**: D490-D495.
- 457 Love MI, Huber W, Anders S. (2014). Moderated estimation of fold change and dispersion for  
458 RNA-seq data with DESeq2. *Genome Biol* **15**: 550.
- 459 Maklashina E, Berthold DA, Cecchini G. (1998). Anaerobic expression of *Escherichia coli*  
460 succinate dehydrogenase: functional replacement of fumarate reductase in the respiratory  
461 chain during anaerobic growth. *J Bacteriol* **180**: 5989-5996.
- 462 Mardanov AV, Panova IA, Beletsky AV, Avakyan MR, Kadnikov VV, Antsiferov DV *et al.* (2016).  
463 Genomic insights into a new acidophilic, copper-resistant *Desulfosporosinus* isolate from the  
464 oxidized tailings area of an abandoned gold mine Lueders T (ed). *FEMS Microbiol Ecol* **92**:  
465 fiw111.
- 466 Marietou A. (2016). Nitrate reduction in sulfate-reducing bacteria. *FEMS Microbiol Lett* **363**:  
467 fnw155.
- 468 Marzocchi U, Trojan D, Larsen S, Meyer RL, Revsbech NP, Schramm A *et al.* (2014). Electric  
469 coupling between distant nitrate reduction and sulfide oxidation in marine sediment. *ISME J* **8**:  
470 1682-1690.
- 471 Männistö MK, Rawat S, Starovoytov V, Häggblom MM. (2012). *Granulicella arctica* sp. nov.,  
472 *Granulicella mallensis* sp. nov., *Granulicella tundricola* sp. nov. and *Granulicella sapmiensis* sp.  
473 nov., novel acidobacteria from tundra soil. *Int J Syst Evol Microbiol* **62**: 2097-2106.
- 474 Mitchell A, Chang H-Y, Daugherty L, Fraser M, Hunter S, Lopez R *et al.* (2015). The InterPro  
475 protein families database: the classification resource after 15 years. *Nucleic Acids Res* **43**:  
476 D213-D221.

- 477 Morris RL, Schmidt TM. (2013). Shallow breathing: bacterial life at low O<sub>2</sub>. *Nat Rev Microbiol* **11**:  
478 205–212.
- 479 Müller AL, Kjeldsen KU, Rattei T, Pester M, Loy A. (2015). Phylogenetic and environmental  
480 diversity of DsrAB-type dissimilatory (bi)sulfite reductases. *ISME J* **9**: 1152–1165.
- 481 Notredame C, Higgins DG, Heringa J. (2000). T-Coffee: a novel method for fast and accurate  
482 multiple sequence alignment. *J Mol Biol* **302**: 205–217.
- 483 Otwell AE, Sherwood RW, Zhang S, Nelson OD, Li Z, Lin H *et al.* (2015). Identification of proteins  
484 capable of metal reduction from the proteome of the Gram-positive bacterium  
485 *Desulfotomaculum reducens* MI-1 using an NADH-based activity assay. *Environ Microbiol* **17**:  
486 1977–1990.
- 487 Parks DH, Imelfort M, Skennerton CT, Hugenholtz P, Tyson GW. (2015). CheckM: assessing the  
488 quality of microbial genomes recovered from isolates, single cells, and metagenomes. *Genome*  
489 *Res* **25**: 1043–1055.
- 490 Pereira IAC, Ramos AR, Grein F, Marques MC, Marques da Silva S, Venceslau SS. (2011). A  
491 comparative genomic analysis of energy metabolism in sulfate reducing bacteria and archaea.  
492 *Front Microbiol* **2**: 69.
- 493 Pereira MM, Santana M, Teixeira M. (2001). A novel scenario for the evolution of haem-copper  
494 oxygen reductases. *Biochim Biophys Acta* **1505**: 185–208.
- 495 Pester M, Bittner N, Deevong P, Wagner M, Loy A. (2010). A 'rare biosphere' microorganism  
496 contributes to sulfate reduction in a peatland. *ISME J* **4**: 1591–1602.
- 497 Pester M, Knorr K-H, Friedrich MW, Wagner M, Loy A. (2012a). Sulfate-reducing microorganisms  
498 in wetlands – fameless actors in carbon cycling and climate change. *Front Microbiol* **3**: 72.
- 499 Pester M, Maixner F, Berry D, Rattei T, Koch H, Lückner S *et al.* (2014). *NxrB* encoding the beta  
500 subunit of nitrite oxidoreductase as functional and phylogenetic marker for nitrite-oxidizing  
501 *Nitrospira*. *Environ Microbiol* **16**: 3055–3071.
- 502 Pester M, Rattei T, Flechl S, Gröngröft A, Richter A, Overmann J *et al.* (2012b). *amoA*-based  
503 consensus phylogeny of ammonia-oxidizing archaea and deep sequencing of *amoA* genes from  
504 soils of four different geographic regions. *Environ Microbiol* **14**: 525–539.
- 505 Plugge CM, Henstra AM, Worm P, Swarts DC, Paulitsch-Fuchs AH, Scholten JCM *et al.* (2012).  
506 Complete genome sequence of *Syntrophobacter fumaroxidans* strain (MPOB<sup>T</sup>). *Stand Genomic*  
507 *Sci* **7**: 91–106.

- 508 Price MN, Dehal PS, Arkin AP. (2010). FastTree 2 – approximately maximum-likelihood trees for  
509 large alignments. *PLoS One* **5**: e9490.
- 510 Quast C, Pruesse E, Yilmaz P, Gerken J, Schweer T, Yarza P *et al.* (2013). The SILVA ribosomal  
511 RNA gene database project: improved data processing and web-based tools. *Nucleic Acids Res*  
512 **41**: D590–D596.
- 513 R Core Team. (2017). R: a language and environment for statistical computing. R Foundation for  
514 Statistical Computing: Vienna, Austria. <http://www.r-project.org/>.
- 515 Rabus R, Hansen TA, Widdel F. (2013). Dissimilatory sulfate- and sulfur-reducing prokaryotes. In:  
516 Rosenberg E, DeLong EF, Lory S, Stackebrandt E, Thompson F (eds). *The Prokaryotes –*  
517 *prokaryotic physiology and biochemistry*. Springer Berlin Heidelberg, pp 309–404.
- 518 Rabus R, Ruepp A, Frickey T, Rattei T, Fartmann B, Stark M *et al.* (2004). The genome of  
519 *Desulfotalea psychrophila*, a sulfate-reducing bacterium from permanently cold Arctic  
520 sediments. *Environ Microbiol* **6**: 887–902.
- 521 Ramel F, Amrani A, Pieulle L, Lamrabet O, Voordouw G, Seddiki N *et al.* (2013). Membrane-  
522 bound oxygen reductases of the anaerobic sulfate-reducing *Desulfovibrio vulgaris*  
523 Hildenborough: roles in oxygen defence and electron link with periplasmic hydrogen oxidation.  
524 *Microbiology* **159**: 2663–2673.
- 525 Rangarajan ES, Li Y, Ajamian E, Iannuzzi P, Kernaghan SD, Fraser ME *et al.* (2005).  
526 Crystallographic trapping of the glutamyl-CoA thioester intermediate of family I CoA  
527 transferases. *J Biol Chem* **280**: 42919–42928.
- 528 Refojo PN, Teixeira M, Pereira MM. (2012). The Alternative complex III: properties and possible  
529 mechanisms for electron transfer and energy conservation. *Biochim Biophys Acta* **1817**: 1852–  
530 1859.
- 531 Reith J, Berking A, Mayer C. (2011). Characterization of an *N*-acetylmuramic acid/*N*-  
532 acetylglucosamine kinase of *Clostridium acetobutylicum*. *J Bacteriol* **193**: 5386–5392.
- 533 Schmidt A, Müller N, Schink B, Schleheck D. (2013). A proteomic view at the biochemistry of  
534 syntrophic butyrate oxidation in *Syntrophomonas wolfei*. *PLoS One* **8**: e56905.
- 535 Shi L, Chen B, Wang Z, Elias DA, Mayer MU, Gorby YA *et al.* (2006). Isolation of a high-affinity  
536 functional protein complex between OmcA and MtrC: two outer membrane decaheme c-type  
537 cytochromes of *Shewanella oneidensis* MR-1. *J Bacteriol* **188**: 4705–4714.
- 538 Shrestha PM, Rotaru A-E, Summers ZM, Shrestha M, Liu F, Lovley DR. (2013). Transcriptomic and



- 539 genetic analysis of direct interspecies electron transfer. *Appl Environ Microbiol* **79**: 2397–2404.
- 540 Simon J, Kroneck PMH. (2013). Microbial sulfite respiration.
- 541 Strittmatter AW, Liesegang H, Rabus R, Decker I, Amann J, Andres S *et al.* (2009). Genome  
542 sequence of *Desulfobacterium autotrophicum* HRM2, a marine sulfate reducer oxidizing organic  
543 carbon completely to carbon dioxide. *Environ Microbiol* **11**: 1038–1055.
- 544 Sumi M, Yohda M, Koga Y, Yoshida M. (1997). F<sub>0</sub>F<sub>1</sub>-ATPase genes from an archaebacterium,  
545 *Methanosarcina barkeri*. *Biochem Biophys Res Commun* **241**: 427–433.
- 546 The UniProt Consortium. (2015). UniProt: a hub for protein information. *Nucleic Acids Res* **43**:  
547 D204–D212.
- 548 Thorup C, Schramm A, Findlay AJ, Finster KW, Schreiber L. (2017). Disguised as a sulfate  
549 reducer: growth of the deltaproteobacterium *Desulfurivibrio alkaliphilus* by sulfide oxidation with  
550 nitrate. *MBio* **8**: e00671–17.
- 551 Vallenet D, Calteau A, Cruveiller S, Gachet M, Lajus A, Josso A *et al.* (2017). MicroScope in 2017:  
552 an expanding and evolving integrated resource for community expertise of microbial genomes.  
553 *Nucleic Acids Res* **45**: D517–D528.
- 554 Varghese NJ, Mukherjee S, Ivanova N, Konstantinidis KT, Mavrommatis K, Kyrpides NC *et al.*  
555 (2015). Microbial species delineation using whole genome sequences. *Nucleic Acids Res* **43**:  
556 6761–6771.
- 557 Visser M, Worm P, Muyzer G, Pereira I a C, Schaap PJ, Plugge CM *et al.* (2013). Genome analysis  
558 of *Desulfotomaculum kuznetsovii* strain 17<sup>T</sup> reveals a physiological similarity with  
559 *Pelotomaculum thermopropionicum* strain SI<sup>T</sup>. *Stand Genomic Sci* **8**: 69–87.
- 560 Ward NL, Challacombe JF, Janssen PH, Henrissat B, Coutinho PM, Wu M *et al.* (2009). Three  
561 genomes from the phylum *Acidobacteria* provide insight into the lifestyles of these  
562 microorganisms in soils. *Appl Environ Microbiol* **75**: 2046–2056.
- 563 Wasmund K, Mußmann M, Loy A. (2017). The life sulfuric: microbial ecology of sulfur cycling in  
564 marine sediments. *Environ Microbiol Rep*. doi:[https://doi.org/10.1111/1758-](https://doi.org/10.1111/1758-2229.12538)  
565 [2229.12538](https://doi.org/10.1111/1758-2229.12538)[[10.1111/1758-2229.12538](https://doi.org/10.1111/1758-2229.12538)].
- 566 Weber KA, Achenbach LA, Coates JD. (2006). Microorganisms pumping iron: anaerobic microbial  
567 iron oxidation and reduction. *Nat Rev Microbiol* **4**: 752–764.
- 568 Weissgerber T, Zigann R, Bruce D, Chang Y-j, Detter JC, Han C *et al.* (2011). Complete genome

569 sequence of *Allochromatium vinosum* DSM 180<sup>T</sup>. *Stand Genomic Sci* **5**: 311–330.

570 Wu AJ, Penner-Hahn JE, Pecoraro VL. (2004). Structural, spectroscopic, and reactivity models for  
571 the manganese catalases. *Chem Rev* **104**: 903–938.

572 Yin Y, Mao X, Yang J, Chen X, Mao F, Xu Y. (2012). dbCAN: a web resource for automated  
573 carbohydrate-active enzyme annotation. *Nucleic Acids Res* **40**: W445–W451.

## 574 **Supplementary Tables**

### 575 **Supplementary Table S1**

576 Taxonomy, genome characteristics, and abundance measures of the DsrAB-encoding MAGs.  
577 Estimation of completeness and contamination was performed with checkM. Genome  
578 abundance estimates are the fraction of metagenomic reads mapped to each MAG in relation to  
579 all quality filtered reads. Values given for native soil are averages of both native soil  
580 metagenomes. mRNA abundance estimates (only acidobacterial MAGs) are the fraction of  
581 fragments (paired-end reads) mapped to all of each MAG's CDS in relation to all quality filtered  
582 fragments. Standard deviation of three replicates is given. Fraction of expressed CDS in native  
583 soil (%) is given only for acidobacterial MAGs.

### 584 **Supplementary Table S2**

585 Curated annotation tables of SbA1–7: (a) dissimilatory sulfur metabolism; (b–h) respiratory  
586 complexes I–V: NADH dehydrogenases (NDH, b), succinate dehydrogenase (SDH, c), quinol—  
587 cytochrome-c reductases (CIII/ACIII, d/e), low- (LATO, f) and high-affinity (HATO, g) terminal  
588 oxidases, and ATP synthases (h); (i) stress (superoxide detoxification), (j) formate  
589 dehydrogenases (FDH), hydrogenases (Hase); (k) cytoplasmic electron transport systems; (l) *N*-  
590 acetylgalactosamine degradation; (m) glycolysis (and gluconeogenesis), pentose phosphate  
591 pathway, and Entner-Doudoroff pathway; (n) citric acid cycle (TCA); (o) pyruvate, acetate,  
592 propionate, and related metabolisms; (p) dissimilatory metal metabolism. Columns provide  
593 functional categories (only a, m, o), pathway step number and/or proposed direction (only m, o),  
594 product (enzyme, transporter) names with EC and TC numbers where appropriate, subunit  
595 names or descriptions where appropriate, gene names, and locus numbers per MAG. All loci are  
596 prefixed by Sbm\_v1\_. Products with multiple copies per MAG are separated into more than one  
597 column (only b–f, j). Fragmented genes (assembly or biological artefacts) are marked with  
598 downward arrows (↓) after their loci numbers. TM, transmembrane subunit. <sup>1</sup> or <sup>2</sup> indicates the  
599 first or last CDS on a scaffold (depending on the reading frame).

600 The following metabolic marker genes are absent in SbA1–7 MAGs: Inorganic sulfur metabolism  
601 (Wasmund *et al.*, 2017): *tsdA*, thiosulfate dehydrogenase; *otr*, octaheme tetrathionate

602 reductase; *phsABC*, thiosulfate reductase; *psrABC*, polysulfide reductase; *sreABC*, sulfur  
603 reductase (Laska *et al.*, 2003); *asrABC*, siroheme-independent dissimilatory sulfite reductase  
604 (anaerobic sulfite reductase) (Huang and Barrett, 1991); *fsr*, coenzyme F<sub>420</sub>-dependent sulfite  
605 reductase (Johnson and Mukhopadhyay, 2005). ATPases: *atpDCQRBEFAG*, N-ATPase (alternative  
606 “archaeal-type” F<sub>o</sub>F<sub>1</sub>-ATPase) (Sumi *et al.*, 1997; Dibrova *et al.*, 2010). Dissimilatory nitrate  
607 reduction to ammonium (DNRA) (Kraft *et al.*, 2011): *napAB*, periplasmic nitrate reductase (NAP),  
608 catalytic subunit is NapA; *nrfA*, periplasmic cytochrome c nitrite reductase (catalytic subunit).  
609 Denitrification (Kraft *et al.*, 2011): *narGHI*, membrane bound cytoplasm-facing nitrate reductase  
610 (NAR), catalytic subunit is NarG; *nirK* or *nirS*, isofunctional but evolutionarily unrelated  
611 periplasmic nitric oxide-forming nitrite reductase (NIR); *norBC*, membrane bound periplasm-  
612 facing nitric oxide reductase (NOR), catalytic subunit is NorB; *nosZ*, periplasmic nitrous oxide  
613 reductase (NOS). Nitrogen fixation: *nifH*, nitrogenase. Nitrification: *amoCAB*, ammonia  
614 monooxygenase (AMO); *nxrAB*, nitrite oxidoreductase (NXR). Methanotrophy (Iguchi *et al.*,  
615 2010): *pmoCAB*, particulate methane monooxygenase (pMMO); *mmoXYBZDC*, soluble methane  
616 monooxygenase (sMMO). Photosynthesis: *pscAB-fmoA*, *Chloracidobacterium thermophilum*  
617 photosystem (Garcia Costas *et al.*, 2012); *pscABCD*, *Chlorobium tepidum* photosystem (Eisen *et*  
618 *al.*, 2002); *pufABCMLH*, *Allochromatium vinosum* photosystem (Weissgerber *et al.*, 2011). ROS  
619 defence: *katN*, mono-functional, manganese catalase (EC 1.11.1.6) (Wu *et al.*, 2004); *katE/katA*,  
620 mono-functional, haem-containing catalase (EC 1.11.1.6). Hydrogenases: [FeFe] hydrogenases.

### 621 **Supplementary Table S3**

622 (a) Supplementary Table S2 deposited in machine-readable format including additional  
623 information. The length of CDS terminated by scaffold borders (<sup>1</sup> or <sup>2</sup> in strand column) is  
624 underestimated, as the true length is not known. bactNOG and NOG IDs were assigned by best-  
625 match principle. Ranks are based on averaged FPKM. Missing ranks indicate that expression was  
626 never detected in any replicate. Significant differential expression is shown separated by factor.  
627 Three-letter-codes are initials of amended substrates (F, A, P, L, B) or N for no-substrate-control,  
628 sulfate stimulation (S) or control without external sulfate (C), and early (E, 8 days) and late (L,  
629 36 days) time points, followed by the log<sub>2</sub> fold change. Over- or underexpression is indicated by  
630 arrows of small/larger than signs. (b) Glycoside hydrolase genes identified with dbCAN.

### 631 **Supplementary Table S4**

632 Glycoside hydrolases genes summarized by EC numbers provided by the carbohydrate-active  
633 enzymes database.

## 634 **Supplementary Figures**

### 635 **Supplementary Figure S1**

636 Reductive bacterial-type DsrAB. Maximum likelihood tree was calculated by FastTree (LG model,  
637 1000 resamplings) using a reference amino acid alignment with reductive bacterial-type DsrAB  
638 indel positions removed (Müller *et al.*, 2015). Branch supports equal to or greater than 0.9 are  
639 indicated by black circles. DsrAB sequences from MAGs and scaffolds are marked in bold.  
640 Binned acidobacterial DsrAB sequences are coloured analogous to Figure 3. Dashed branches  
641 represent incomplete *dsrAB* gene sequences (e.g., caused by a contig ending) that were  
642 sufficiently long to be included in the phylogenetic analysis (only *dsrAB* genes on scaffold 43ik  
643 were too short and omitted). The extent of subdivision 3 group is unclear and indicated by a  
644 dashed line. Outgroup sequences are shown in Supplementary Figure S2.

### 645 **Supplementary Figure S2**

646 Oxidative bacterial-type DsrAB. Maximum likelihood phylogenetic tree was calculated by  
647 FastTree (LG model, 1000 resamplings) using a reference amino acid alignment with oxidative  
648 bacterial-type DsrAB indel positions removed (Müller *et al.*, 2015). Branch supports equal to or  
649 greater than 0.9 are indicated by black circles. DsrAB sequences from MAGs and scaffolds are  
650 marked in bold. Dashed branches represent partial DsrAB sequences on scaffolds.

### 651 **Supplementary Figure S3**

652 Phylogenomic tree and pairwise average amino acid identities of *Acidobacteria* genomes and  
653 MAGs. NCBI assembly accessions are given in parentheses. Novel sequences from this study are  
654 marked in bold. *Acidobacterial* subdivisions are given below. Dendrograms are a phylogenomic  
655 tree calculated with phylobayes from a checkM-produced and -filtered amino acid alignment. All  
656 branches are supported >0.9. Genomes assemblies from the *Firmicutes*, *Proteobacteria*, and  
657 *Verrucomicrobia* were used as outgroup. MAG SbA2 has an AAI of 37–49% to the other genomes  
658 and MAGs but was not included in the figure because it lacks the marker genes used for the  
659 phylogenomic tree.

### 660 **Supplementary Figure S4**

661 Beeswarm plots of expression change of dissimilatory sulfur metabolism genes in anoxic peat  
662 soil microcosms. Fold-changes are calculated by pairwise comparisons between replicate  
663 metatranscriptomes of the native soil and of each incubation regime and time point. Significant  
664 ( $p < 0.05$ ) changes are highlighted by back circles.

665

666



Figure S2.

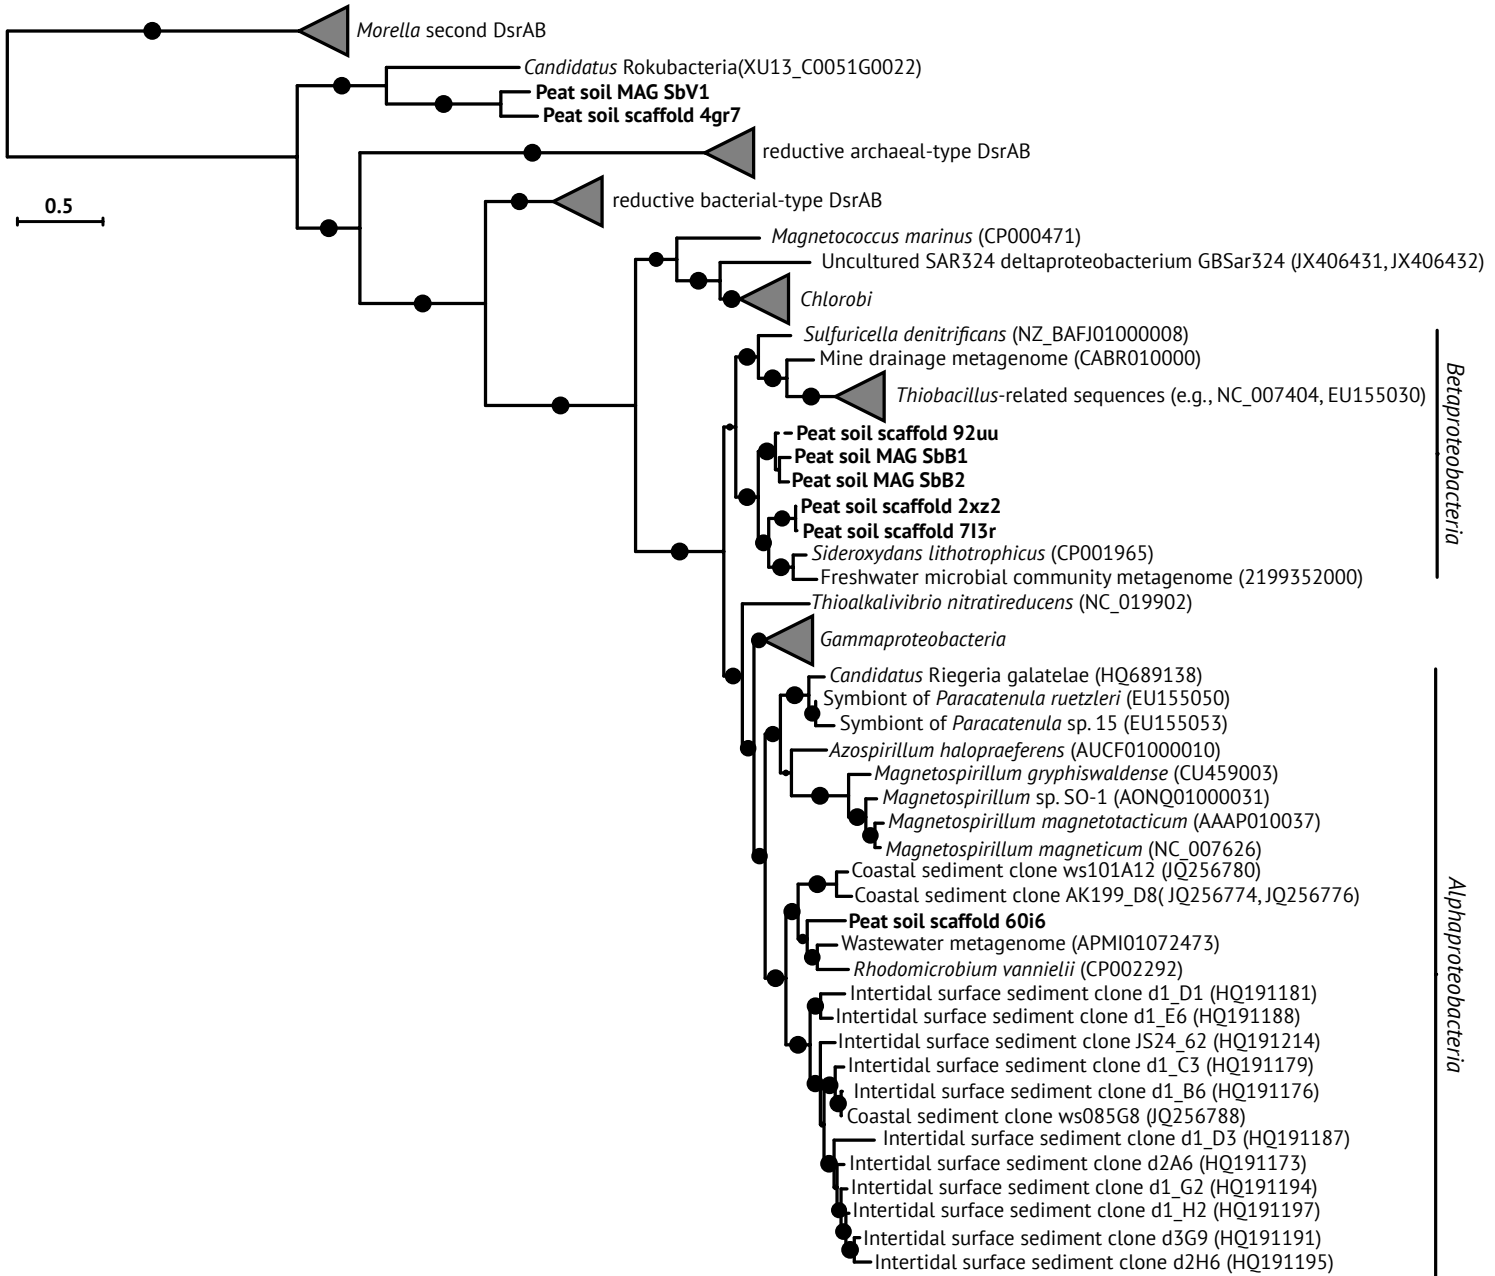

Fig. S3.

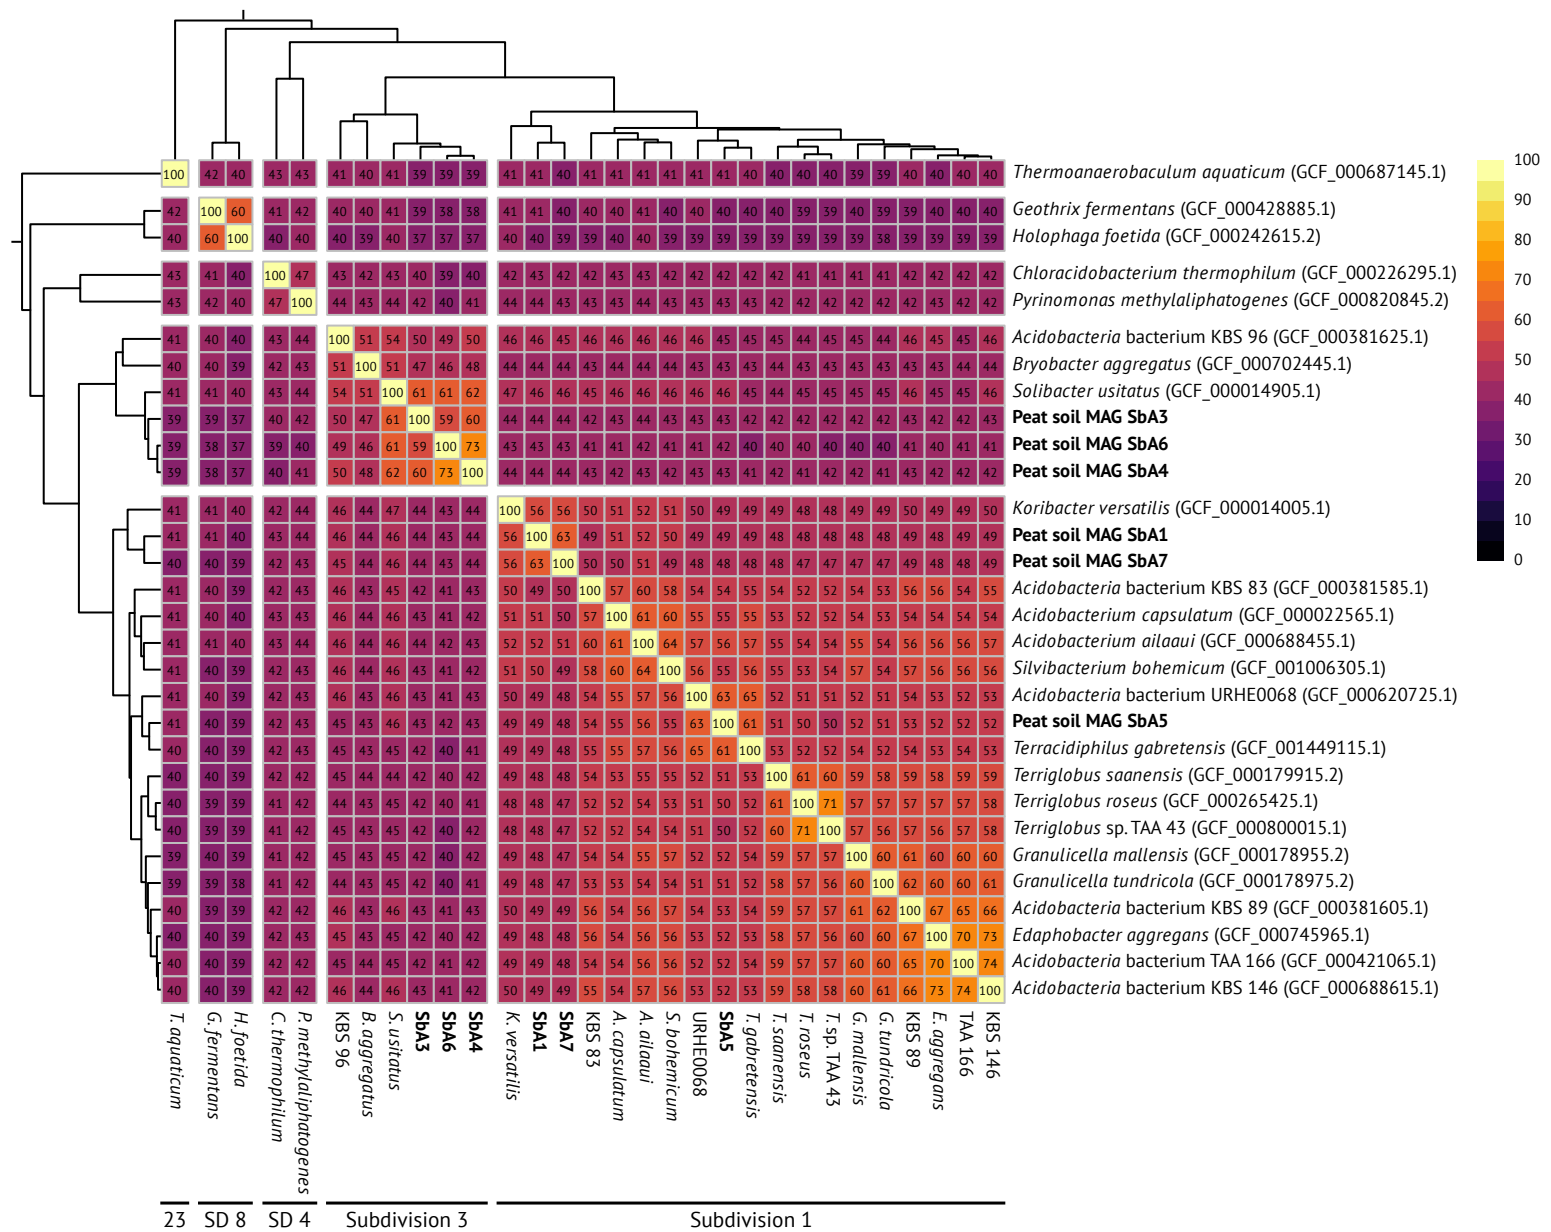

23

SD 8

SD 4

Subdivision 3

Subdivision 1

**Fig. S4.**

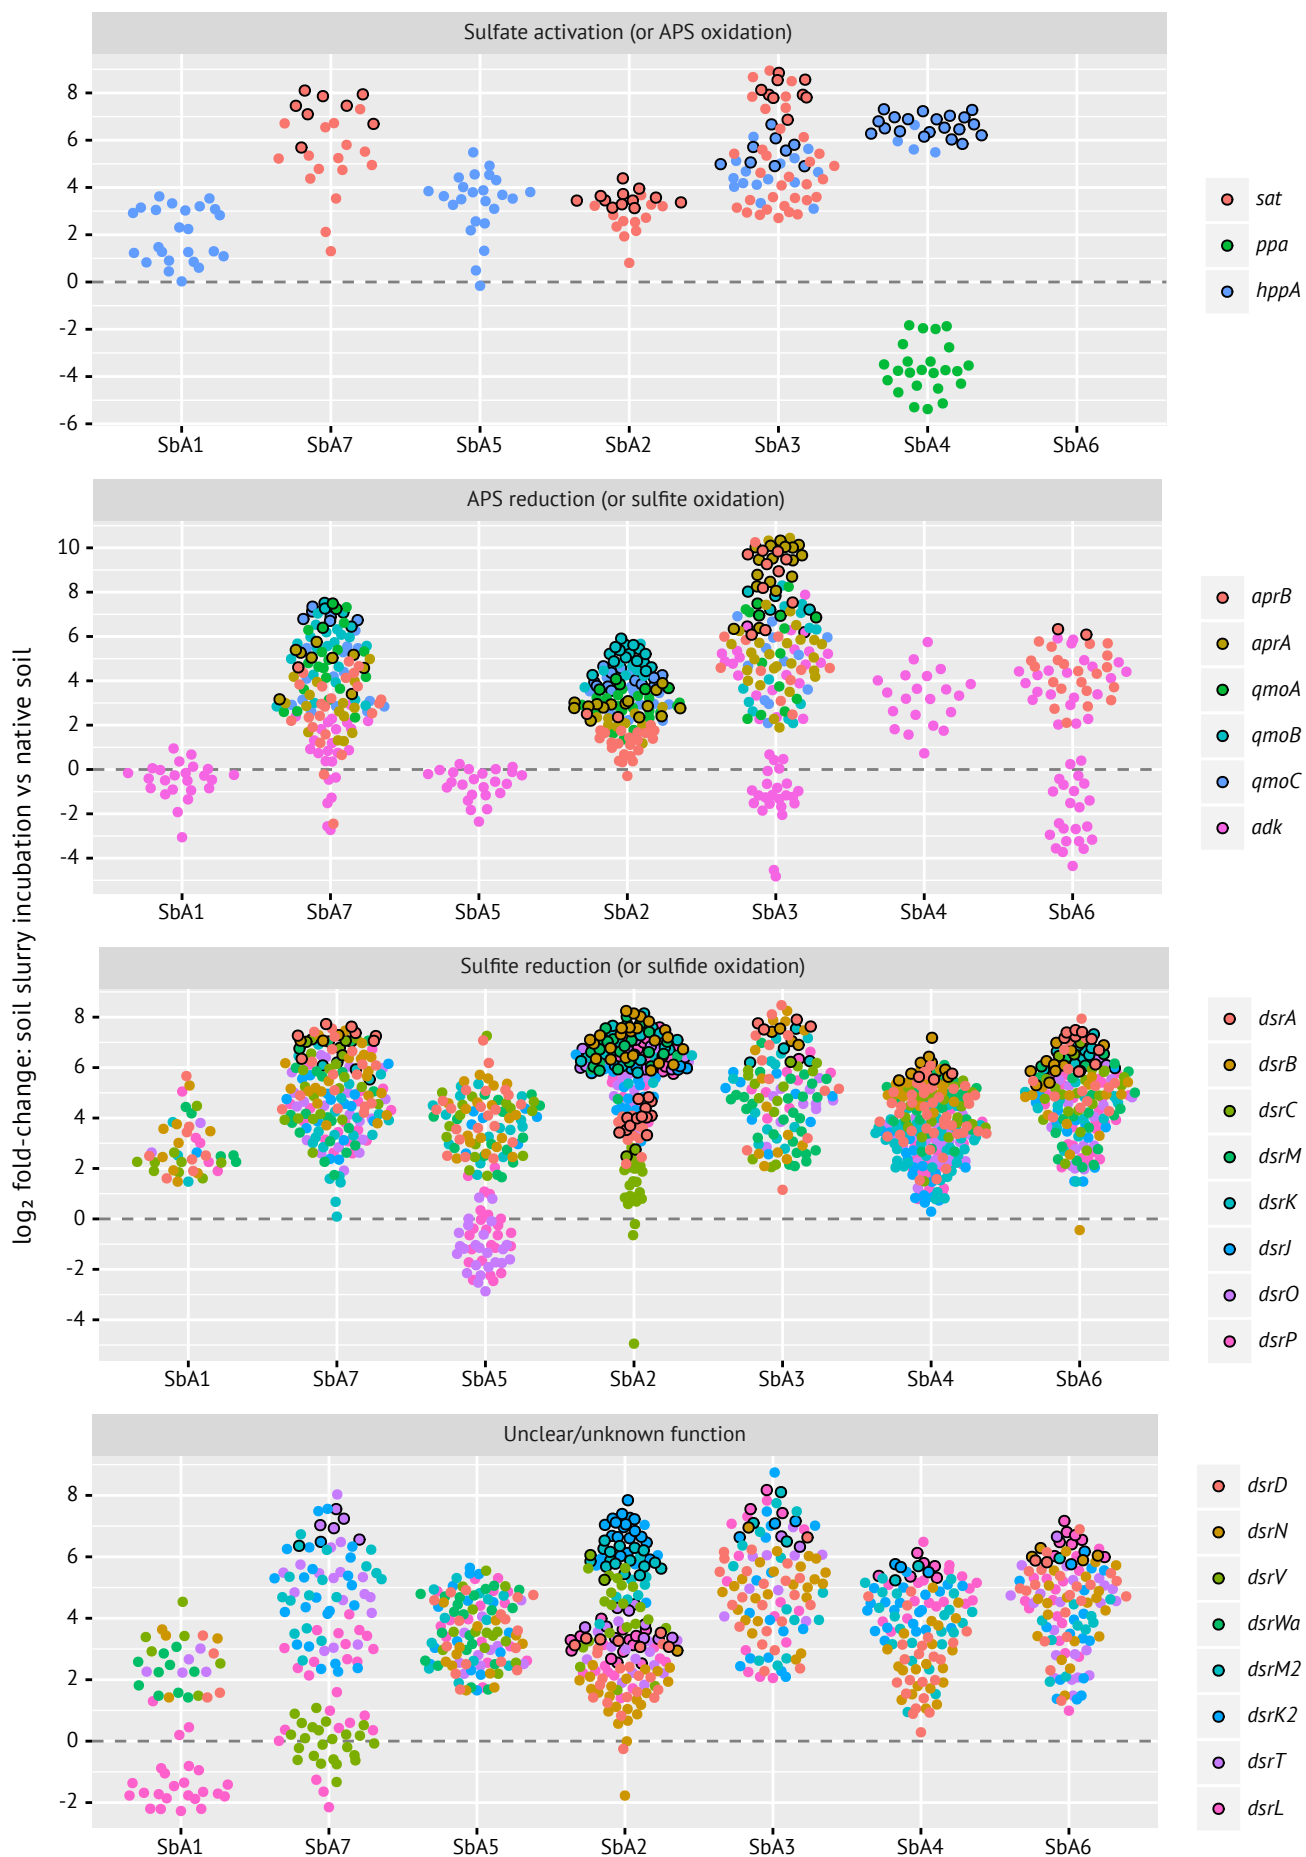

Source: http://biorxiv.org/content/10.1101/197269v1.full.pdf
